# Supplementary material
Source: PubMed Central journal article supplement (PMC4251065)
Supplement: np500617u_si_001.pdf [file np500617u_si_001.pdf]

## Isolation of Pyrrolocins A-C: *cis*- and *trans*-Decalin Tetramic Acid Antibiotics from an Endophytic Fungal-Derived Pathway

Raquel C. Jadulco,<sup>†</sup> Michael Koch,<sup>†</sup> Thomas B. Kakule,<sup>‡</sup> Eric W. Schmidt,<sup>‡</sup> Anita Orendt,<sup>Δ</sup> Haiyin He,<sup>§</sup> Jeffrey E. Janso,<sup>§</sup> Guy T. Carter,<sup>¶</sup> Erica C. Larson,<sup>†</sup> Christopher Pond,<sup>†</sup> Teatulohi K. Matainaho,<sup>⊥</sup> and Louis R. Barrows<sup>†⊥\*</sup>

<sup>†</sup>Department of Pharmacology and Toxicology, University of Utah, Salt Lake City, Utah, USA

<sup>‡</sup>Department of Medicinal Chemistry, University of Utah, Salt Lake City, Utah, USA

<sup>Δ</sup> Center for High Performance Computing, University of Utah, Salt Lake City, Utah, USA

<sup>§</sup>Natural Products – Worldwide Medicinal Chemistry, Pfizer Worldwide Research and Development, 445 Eastern Point Road, Groton, Connecticut 06340, USA

<sup>¶</sup>Carter-Bernan Consulting, 350 Phillips Hill Road, New City, NY 10956 , USA

<sup>⊥</sup>School of Medicine and Health Sciences, University of Papua New Guinea, Boroko, NCD, Papua New Guinea

\*Email: [lbarrows@pharm.utah.edu](mailto:lbarrows@pharm.utah.edu). Phone: (801) 5824547. Fax (801) 5855111

### List of supporting information

| No. | Content                                                                                                            | Page |
|-----|--------------------------------------------------------------------------------------------------------------------|------|
| S1  | <sup>1</sup> H NMR of Compound <b>1</b> in DMSO- <i>d</i> <sub>6</sub> at 400 MHz.                                 | 3    |
| S2  | <sup>13</sup> C NMR of Compound <b>1</b> in DMSO- <i>d</i> <sub>6</sub> at 100 MHz.                                | 4    |
| S3  | COSY of Compound <b>1</b> in DMSO- <i>d</i> <sub>6</sub> at 400 MHz.                                               | 5    |
| S4  | HSQC of Compound <b>1</b> in DMSO- <i>d</i> <sub>6</sub> at 400 MHz.                                               | 6    |
| S5  | HMBC of Compound <b>1</b> in DMSO- <i>d</i> <sub>6</sub> at 400 MHz.                                               | 7    |
| S6  | ROESY of Compound <b>1</b> in DMSO- <i>d</i> <sub>6</sub> at 400 MHz.                                              | 8    |
| S7  | <sup>1</sup> H NMR of Compound <b>2</b> in CD <sub>3</sub> OD at 500 MHz.                                          | 9    |
| S8  | <sup>13</sup> C NMR of Compound <b>2</b> in CD <sub>3</sub> OD at 125 MHz.                                         | 10   |
| S9  | COSY of Compound <b>2</b> in DMSO- <i>d</i> <sub>6</sub> at 500 MHz.                                               | 11   |
| S10 | ROESY of Compound <b>2</b> in DMSO- <i>d</i> <sub>6</sub> at 500 MHz.                                              | 12   |
| S11 | HMBC of Compound <b>2</b> in DMSO- <i>d</i> <sub>6</sub> at 500 MHz.                                               | 13   |
| S12 | HSQC of Compound <b>2</b> in DMSO- <i>d</i> <sub>6</sub> at 500 MHz.                                               | 14   |
| S13 | <sup>1</sup> H NMR of Compound <b>3</b> in DMSO- <i>d</i> <sub>6</sub> at 500 MHz.                                 | 15   |
| S14 | <sup>13</sup> C NMR of Compound <b>3</b> in DMSO- <i>d</i> <sub>6</sub> at 125 MHz.                                | 16   |
| S15 | COSY of Compound <b>3</b> in DMSO- <i>d</i> <sub>6</sub> at 500 MHz.                                               | 17   |
| S16 | HMBC of Compound <b>3</b> in DMSO- <i>d</i> <sub>6</sub> at 500 MHz.                                               | 18   |
| S17 | HSQC of Compound <b>3</b> in DMSO- <i>d</i> <sub>6</sub> at 500 MHz.                                               | 19   |
| S18 | ROESY of Compound <b>3</b> in DMSO- <i>d</i> <sub>6</sub> at 500 MHz.                                              | 20   |
| S19 | Relevant part of the HPLC chromatogram of hydrolytic product serine-FDLA (HPS-FDLA) co-injected with D-serine-FDLA | 21   |
| S20 | Relevant part of the HPLC chromatogram of hydrolytic product serine-FDLA (HPS-FDLA) co-injected with L-serine-FDLA | 22   |

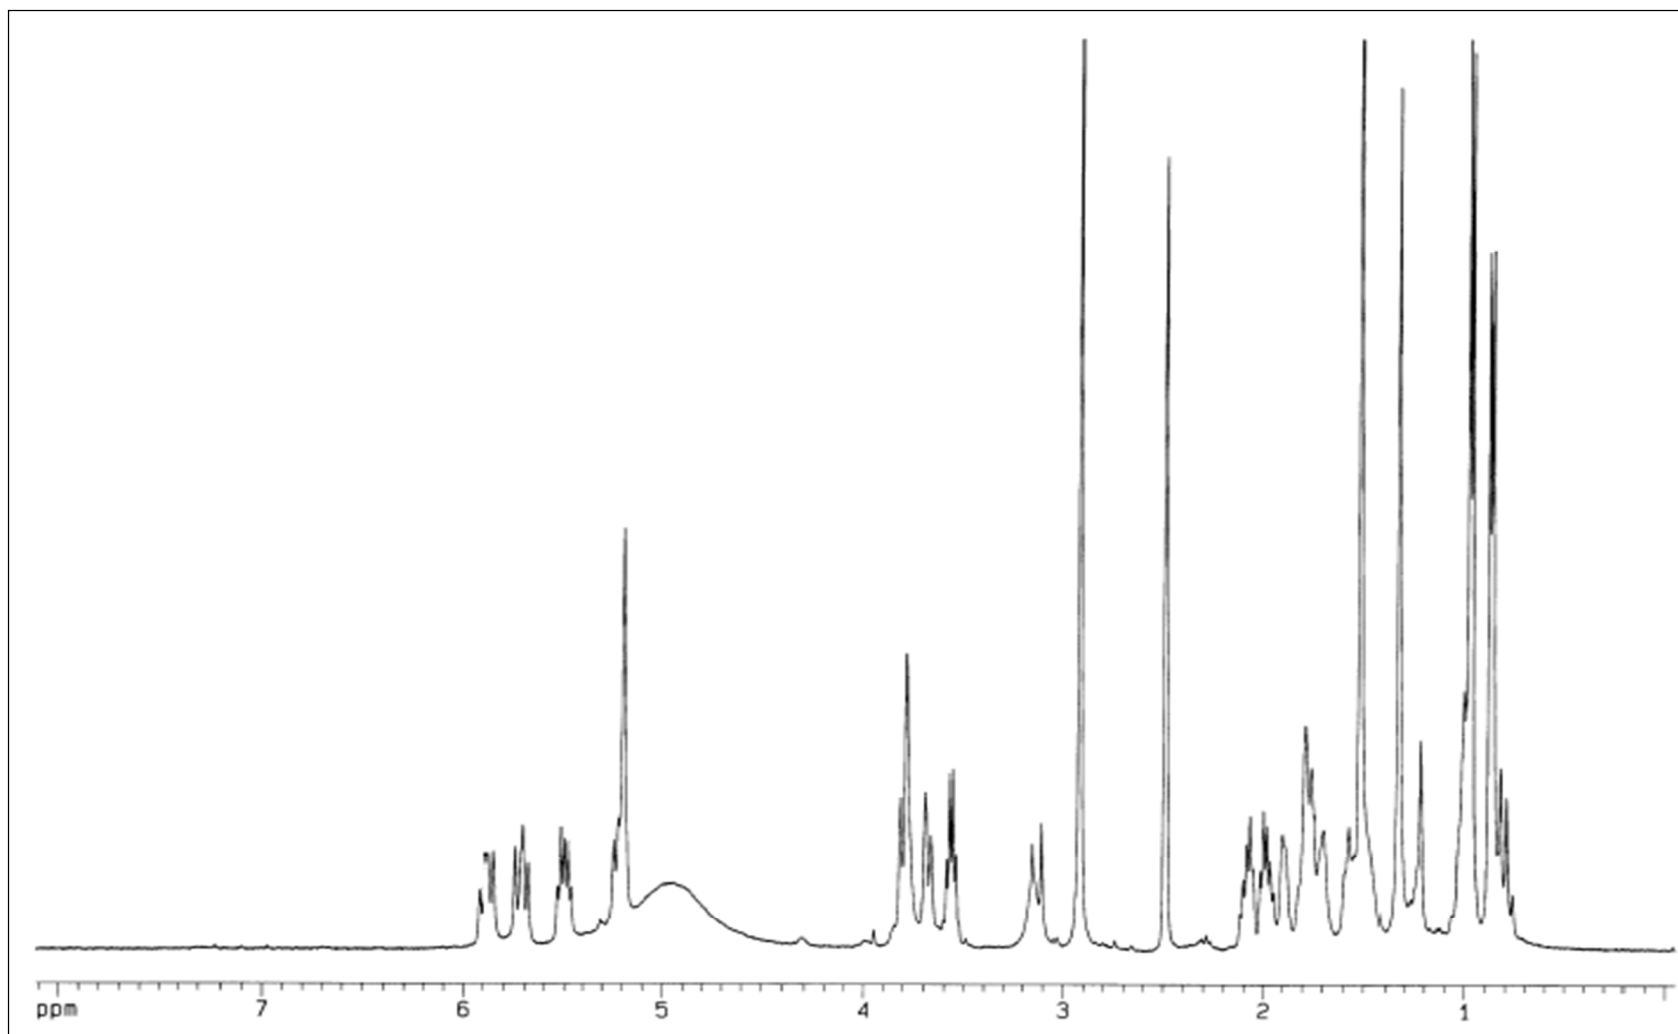

S1.  $^1\text{H}$  NMR of Compound **1** in  $\text{DMSO-}d_6$  at 400 MHz.

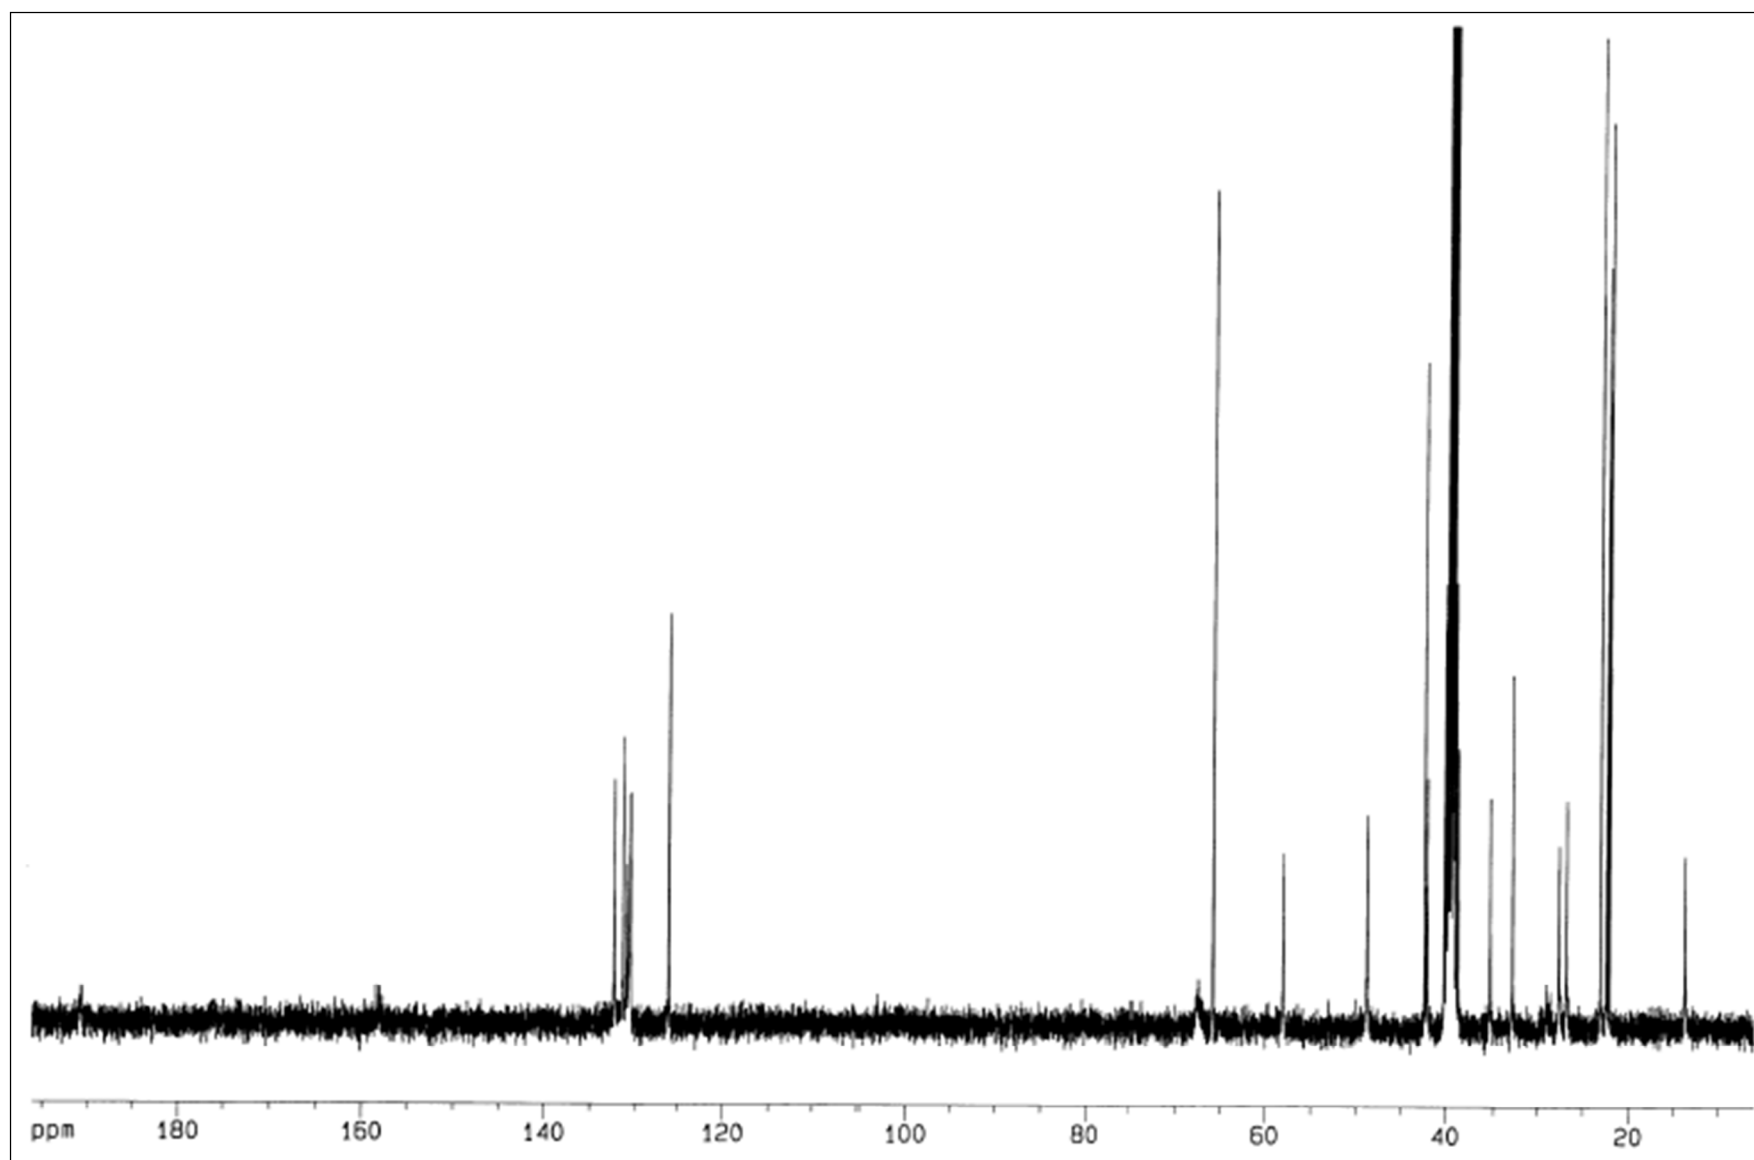

S2.  $^{13}\text{C}$  NMR of Compound **1** in  $\text{DMSO-}d_6$  at 100 MHz.

ENDO-0549  
DMSO-d6

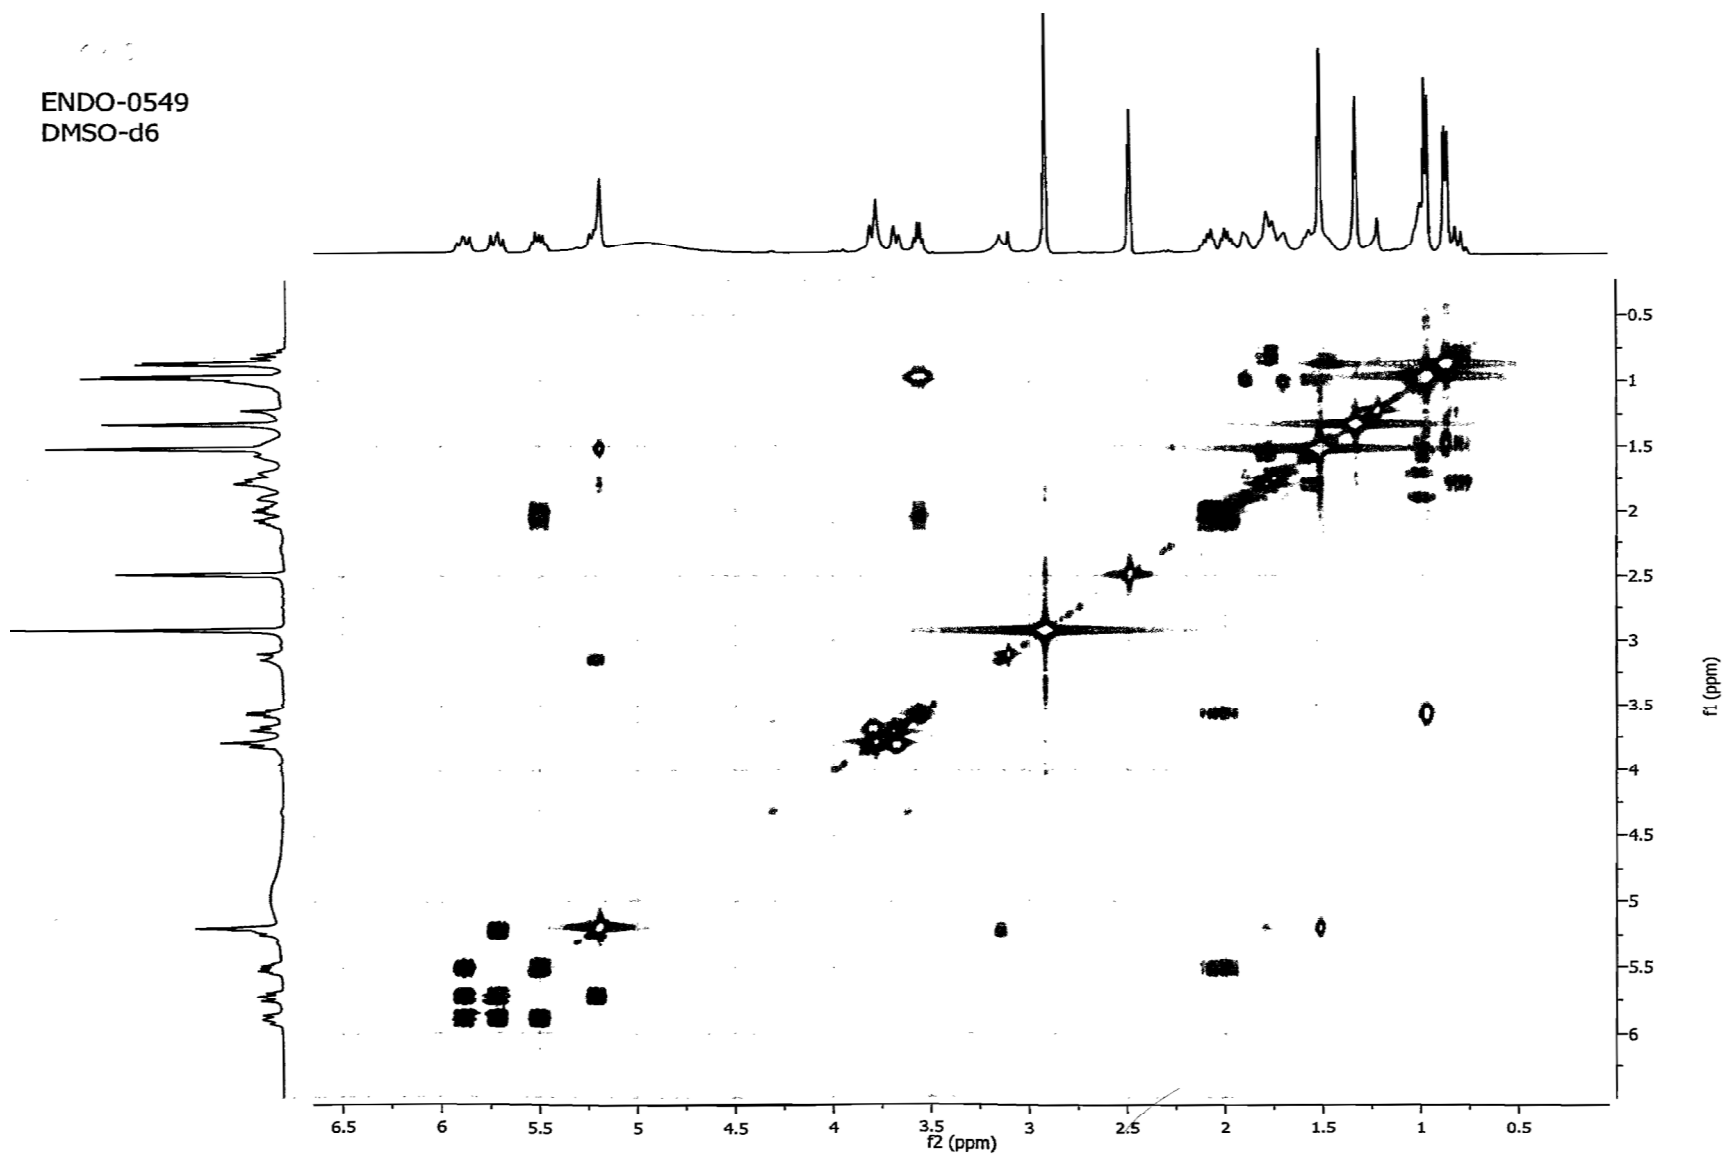

S3. COSY of Compound 1 in DMSO-*d*<sub>6</sub> at 400 MHz.

549  
db

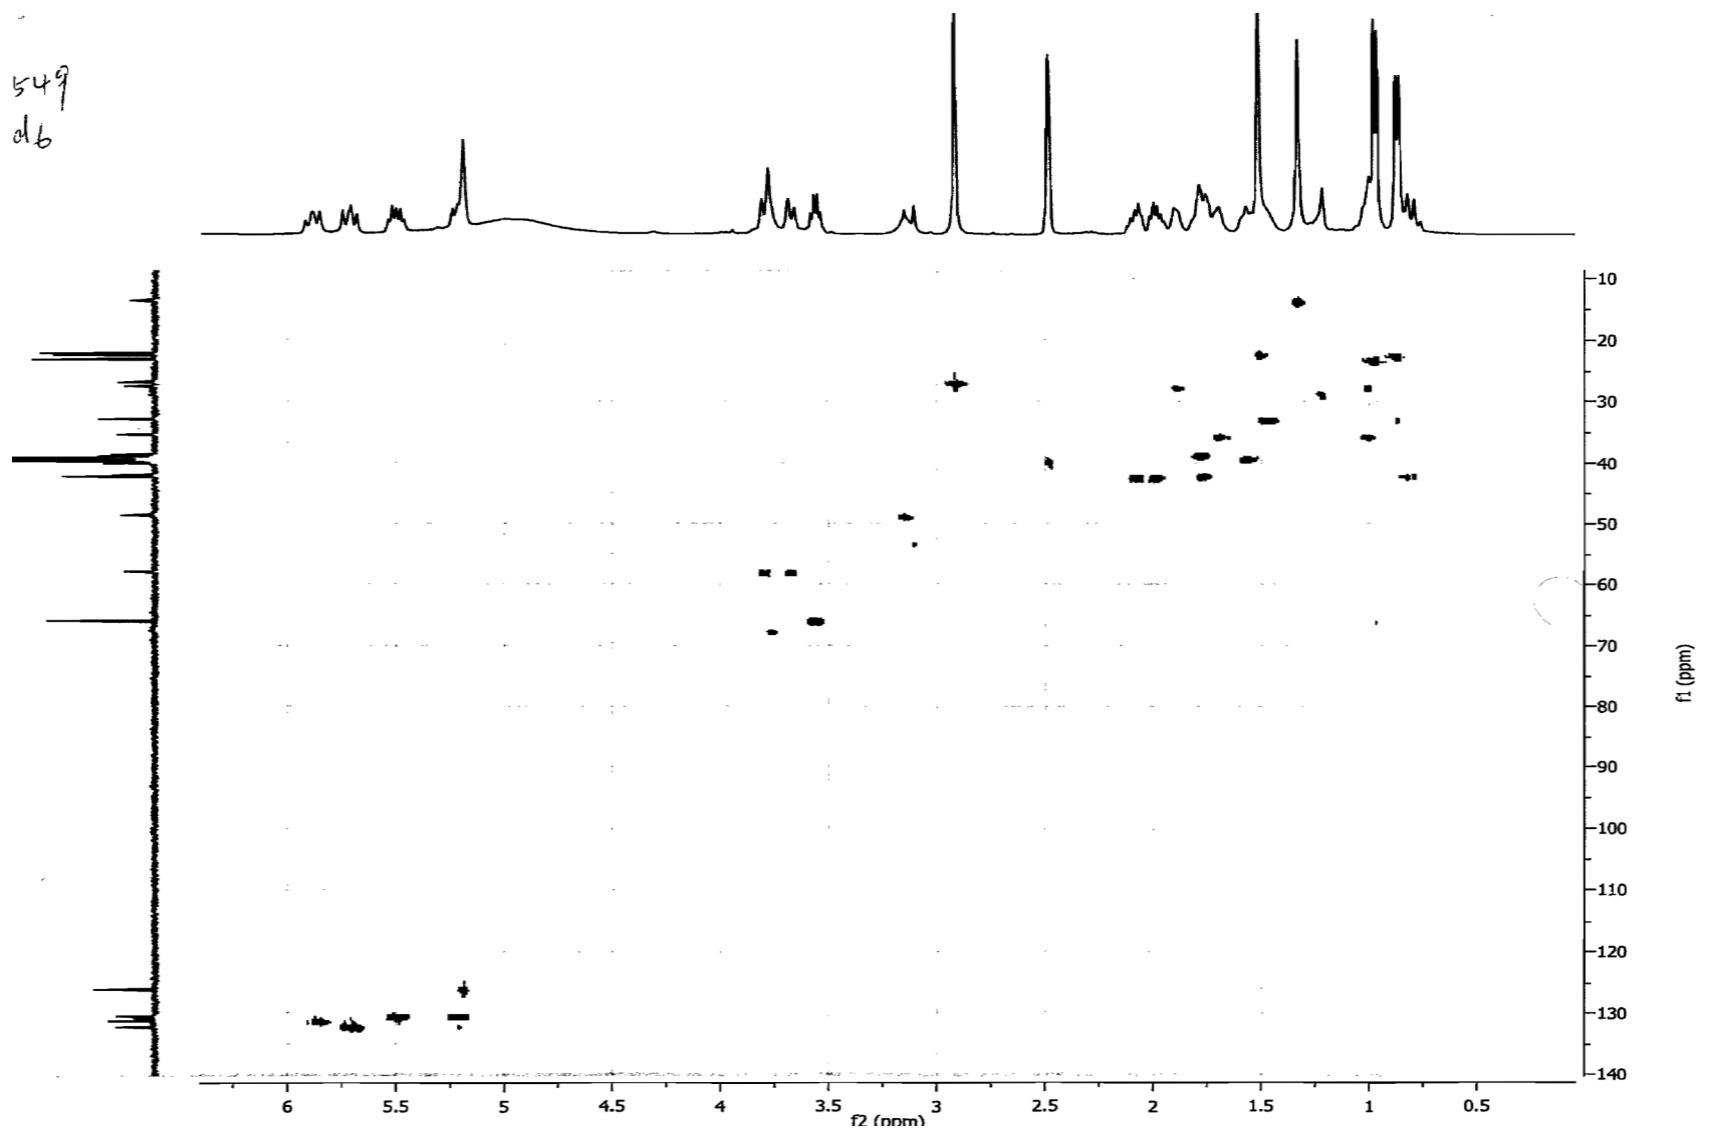

S4. HSQC of Compound 1 in DMSO- $d_6$  at 400 MHz.

1do-0549  
MSO-d6

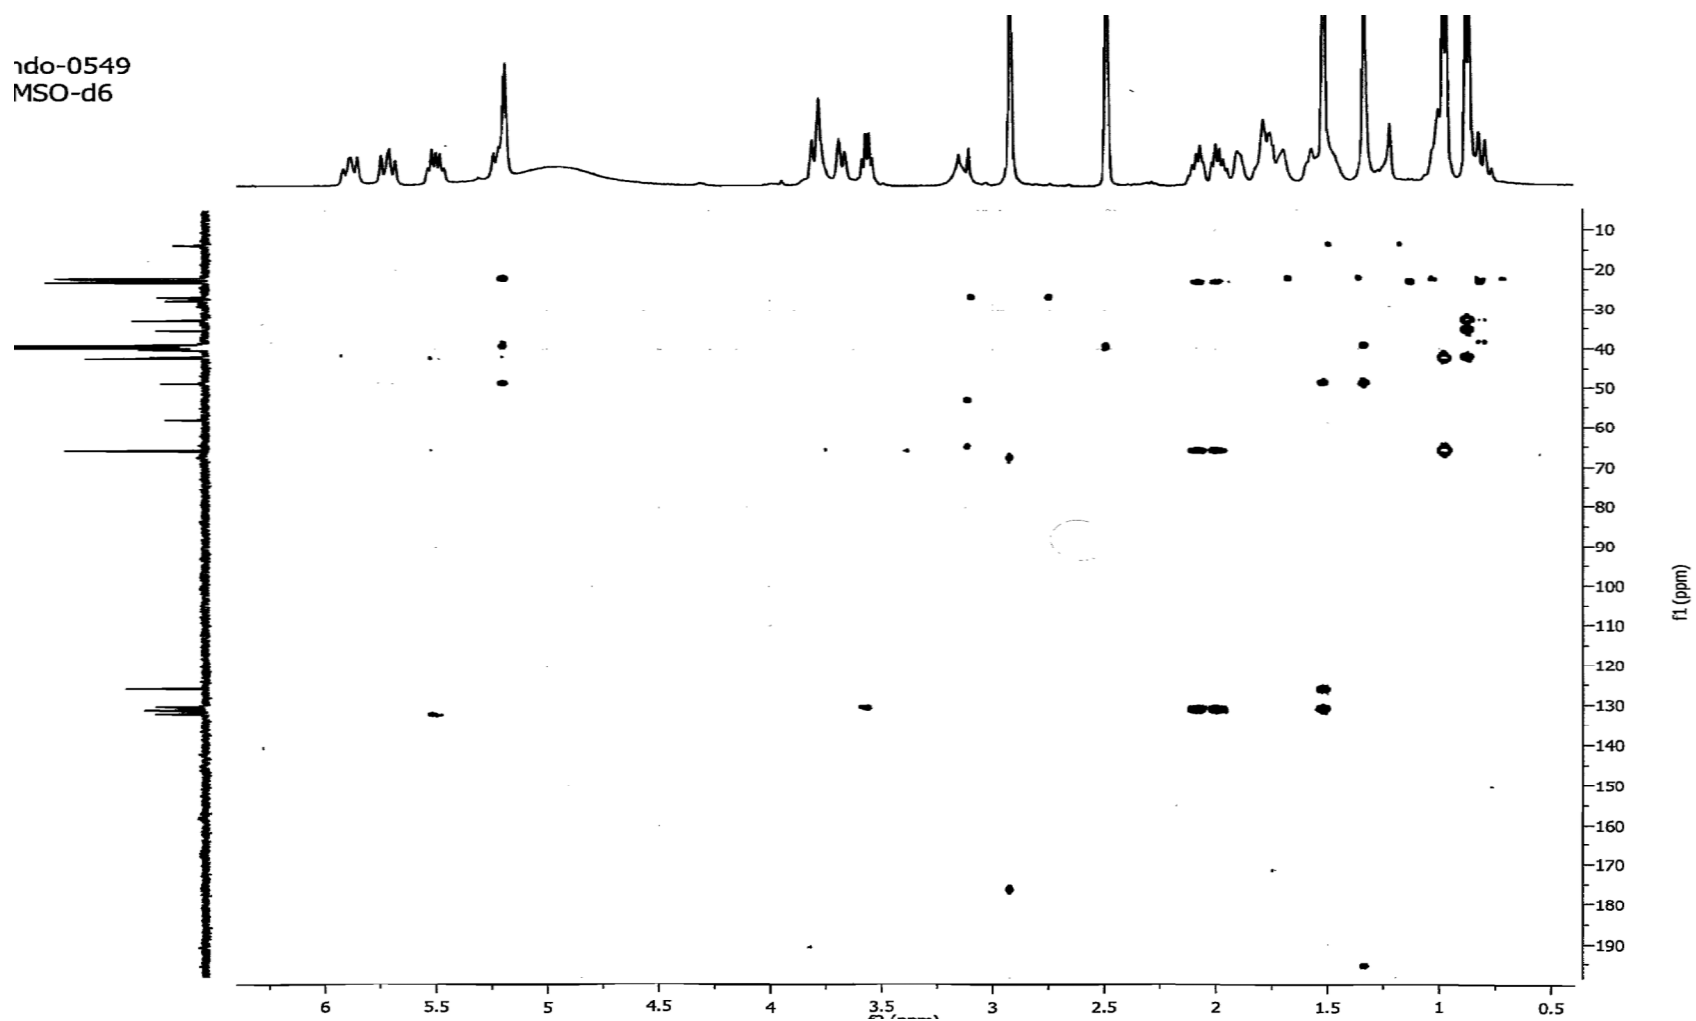

S5. HMBC of Compound 1 in DMSO-*d*<sub>6</sub> at 400 MHz.

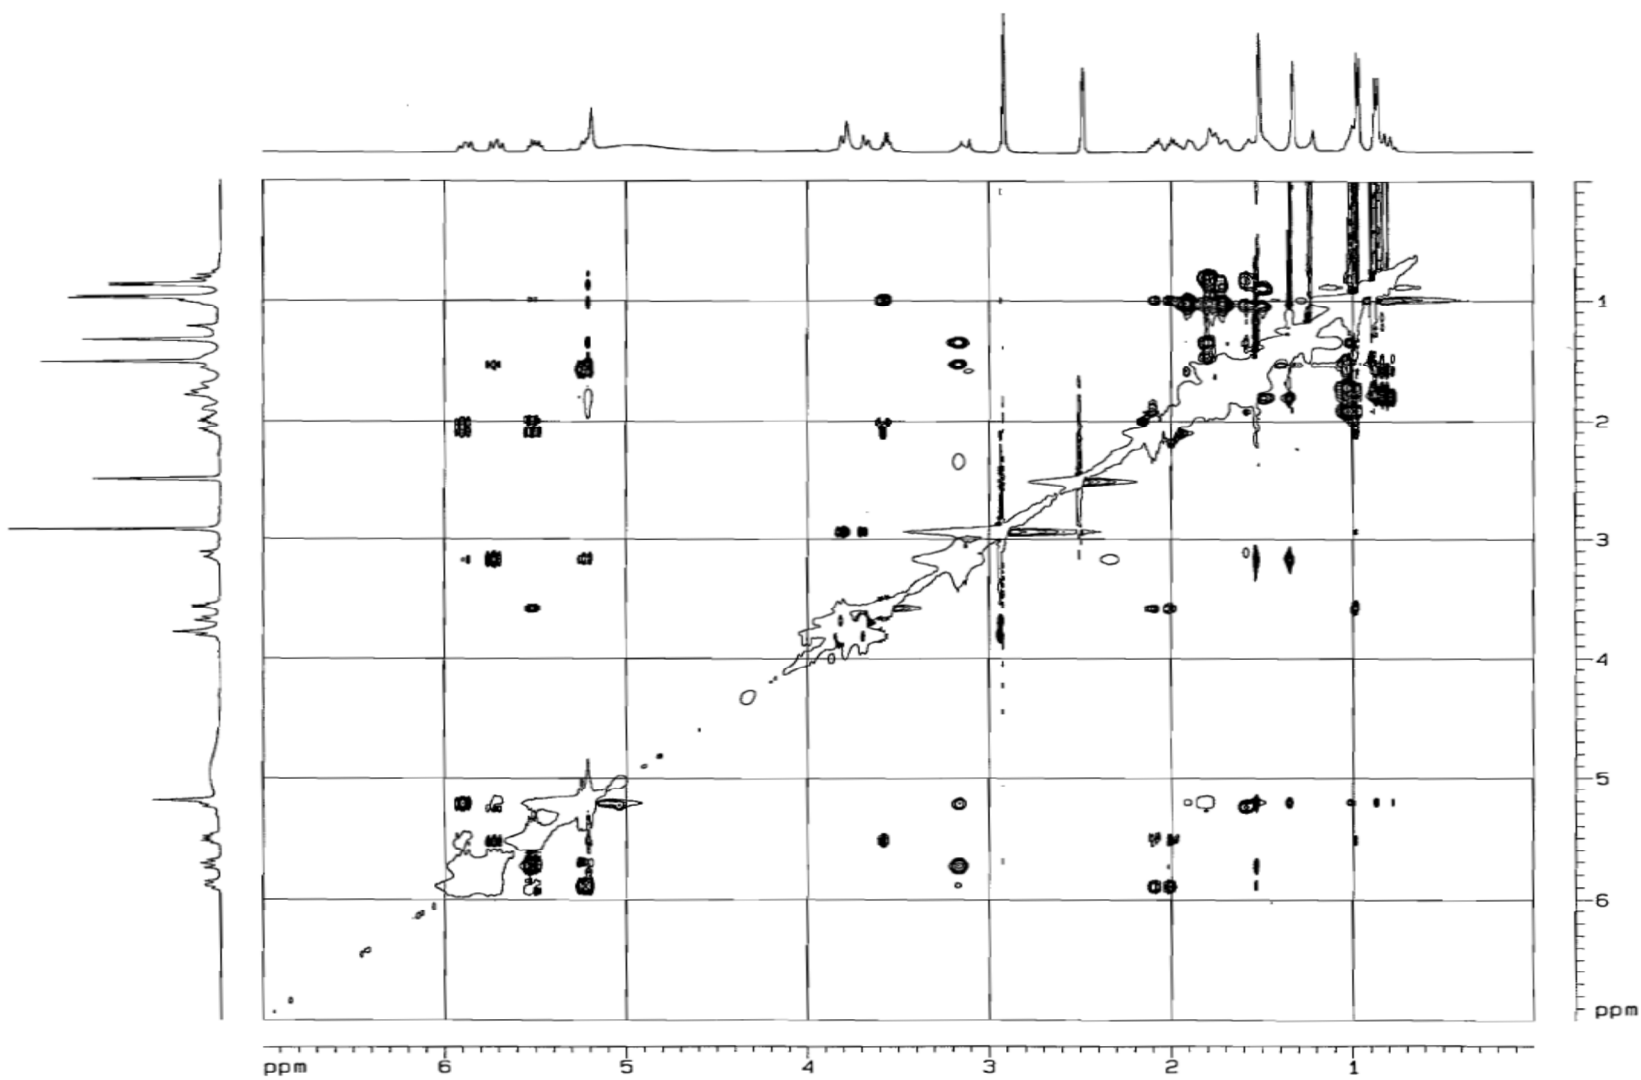

S6. ROESY of Compound **1** in DMSO-*d*<sub>6</sub> at 400 MHz.



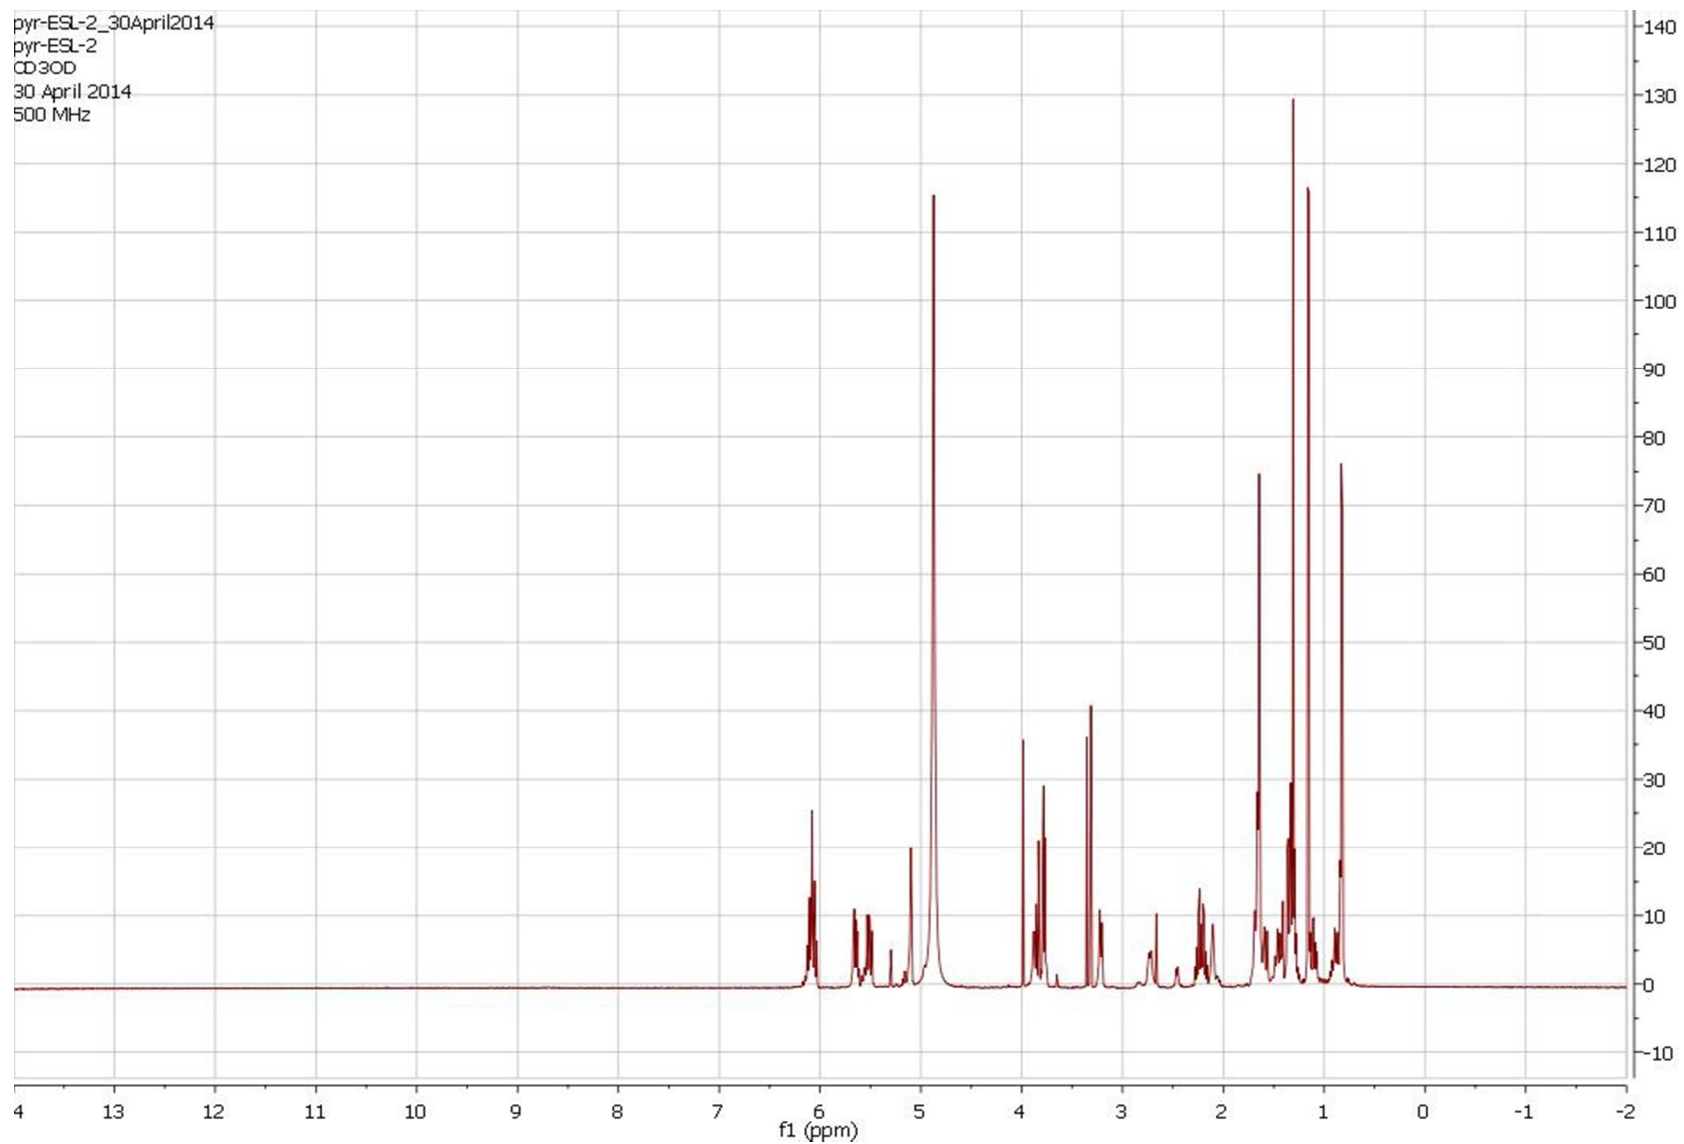

S7. <sup>1</sup>H NMR of Compound **2** in CD<sub>3</sub>OD at 500 MHz.

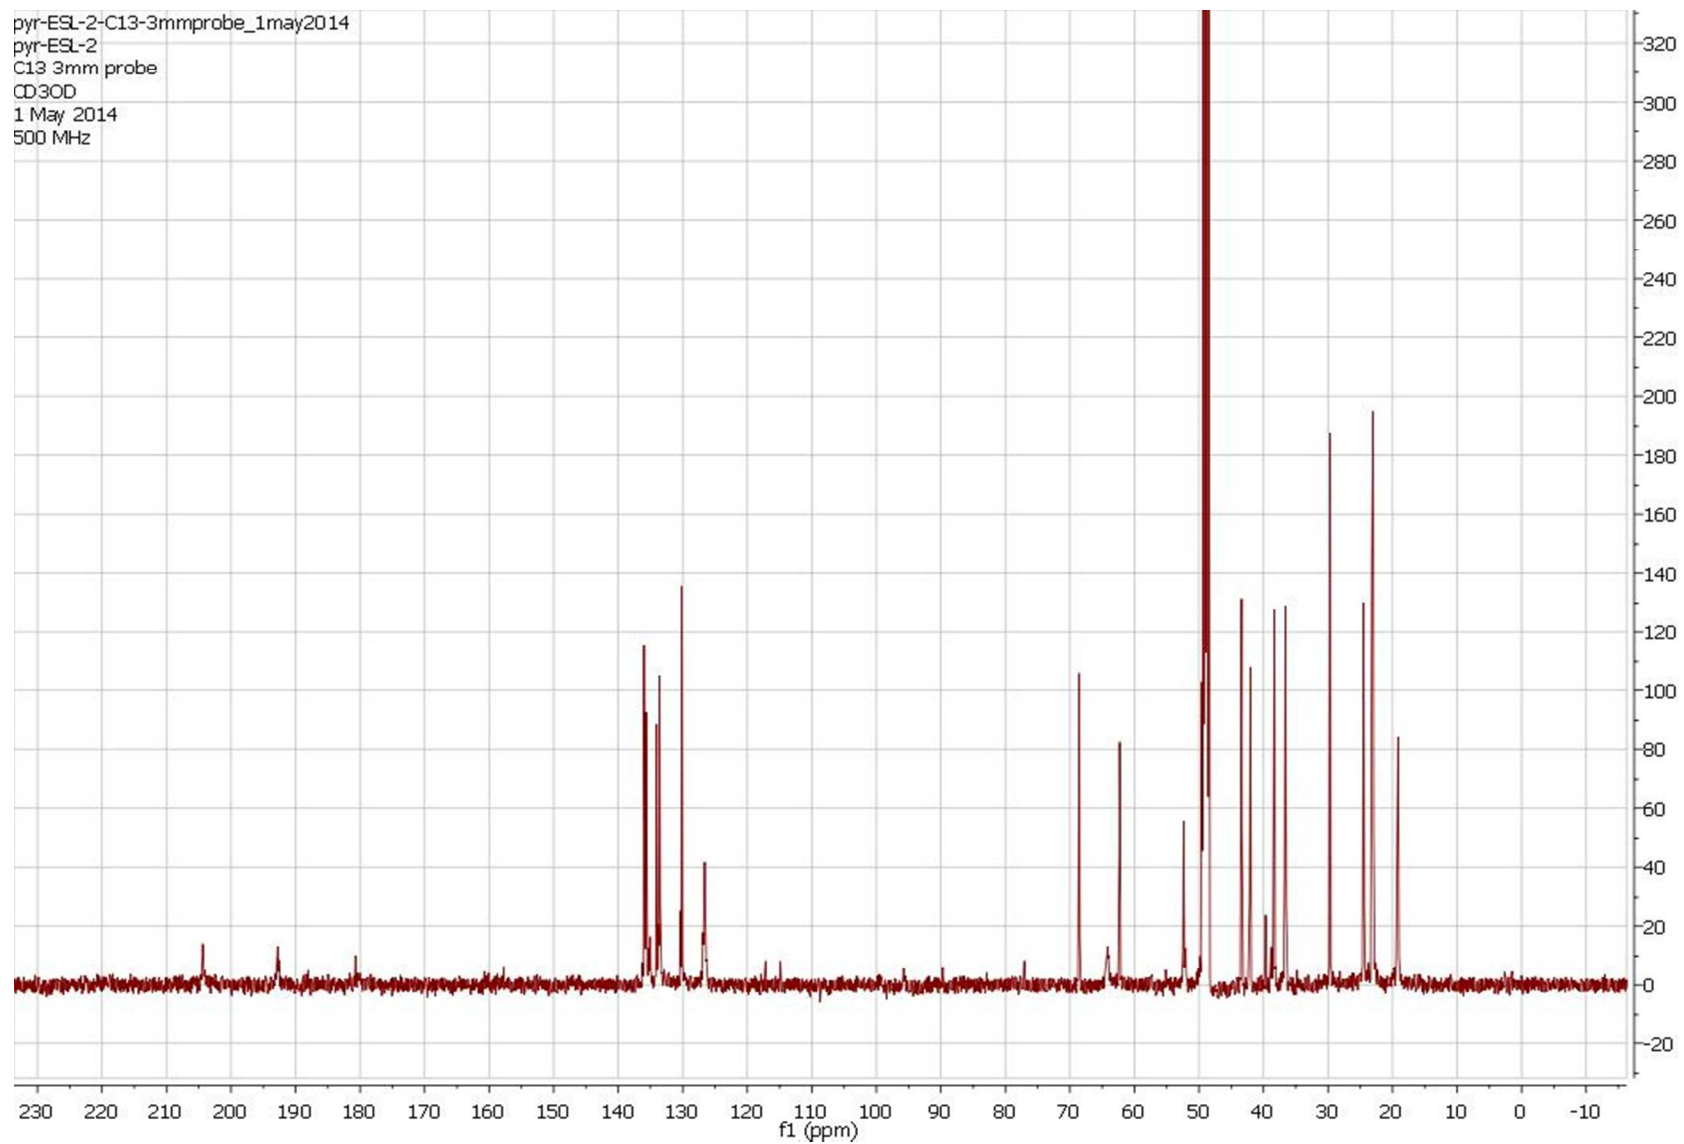

S8.  $^{13}\text{C}$  NMR of Compound **2** in  $\text{CD}_3\text{OD}$  at 125 MHz.

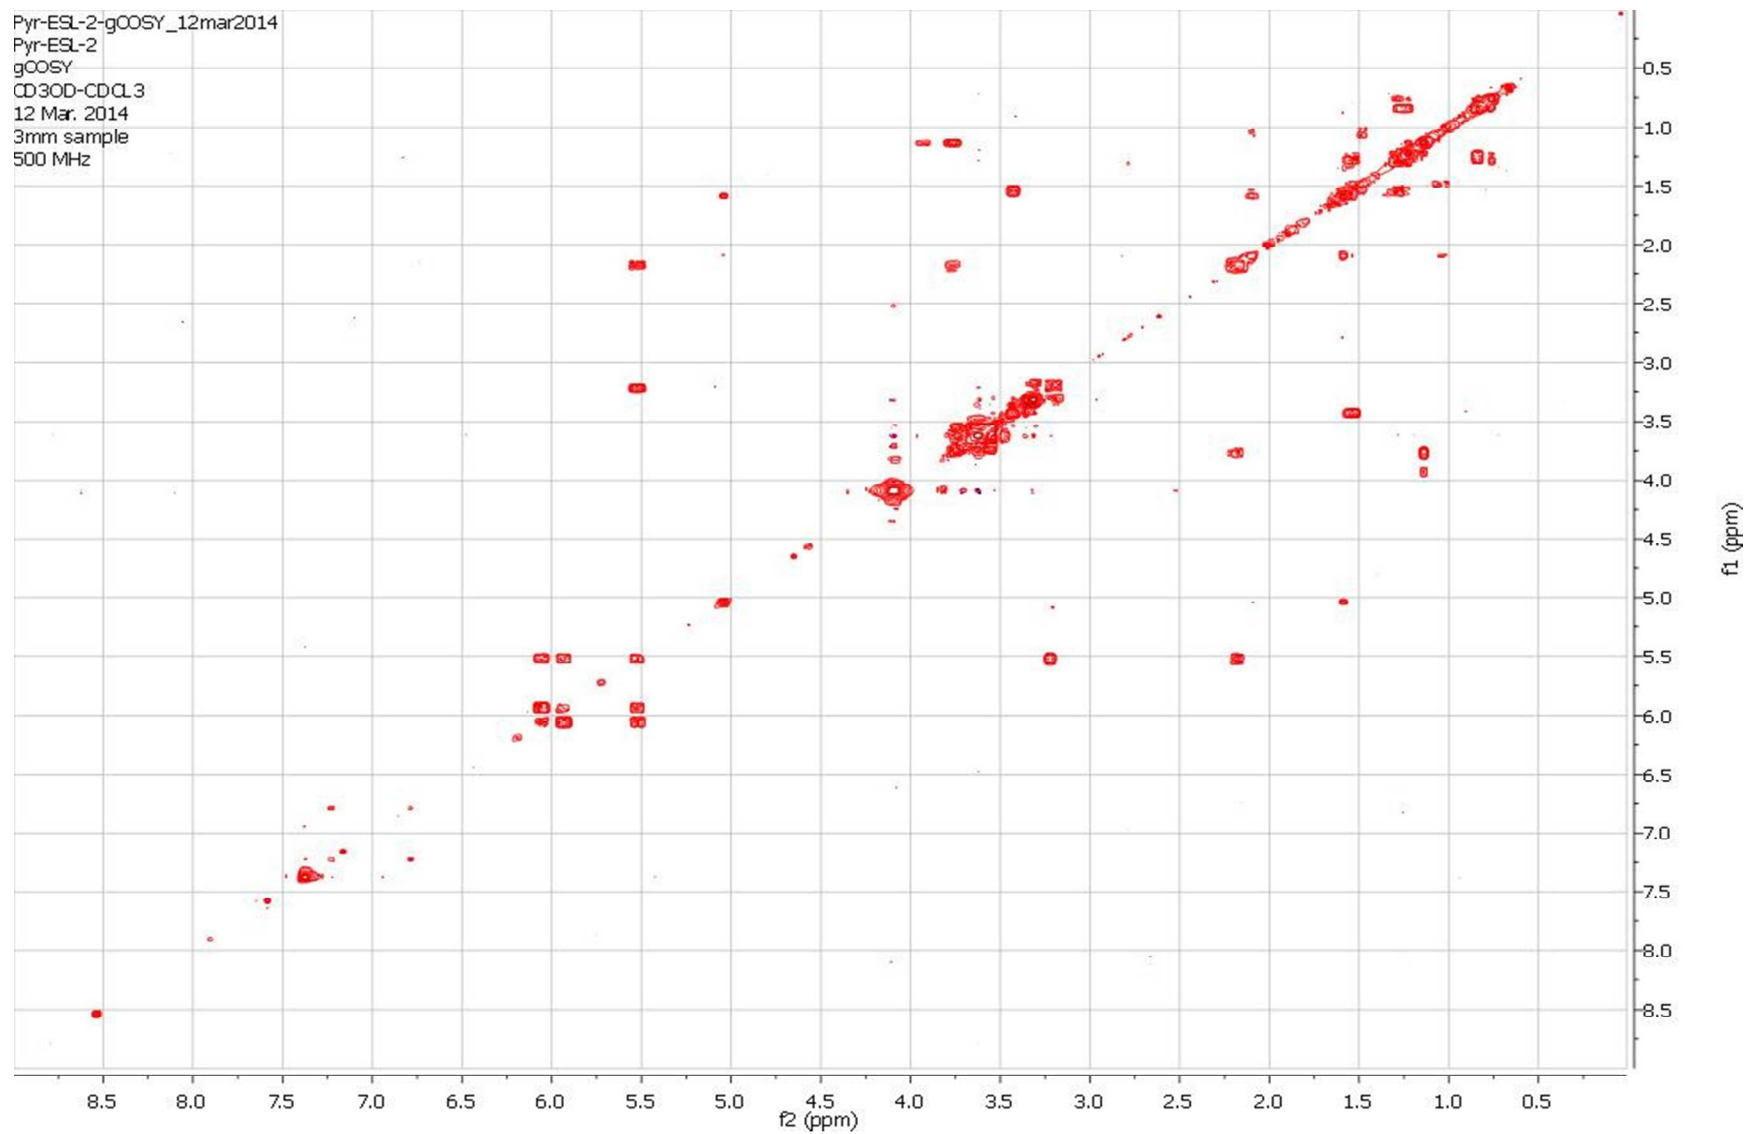

S9. COSY of Compound **2** in DMSO- $d_6$  at 500 MHz.

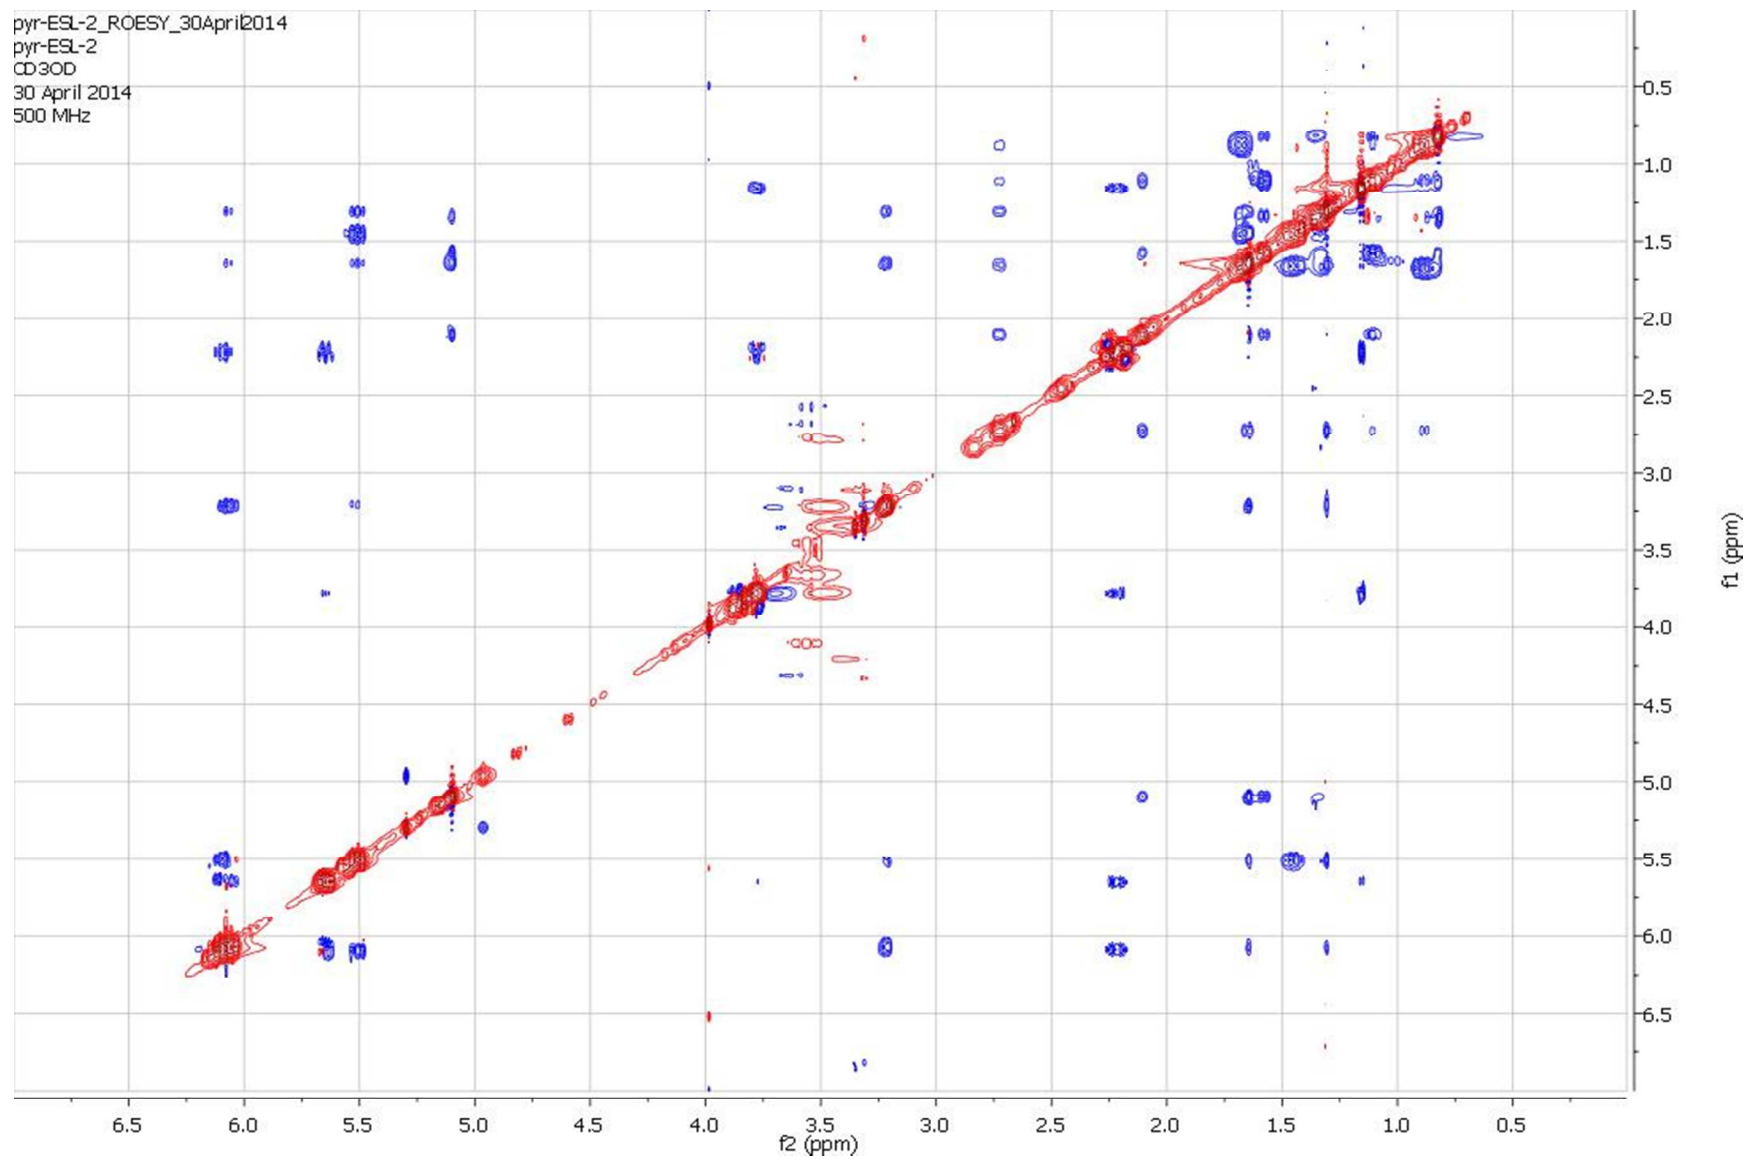

S10. ROESY of Compound **2** in DMSO- $d_6$  at 500 MHz.

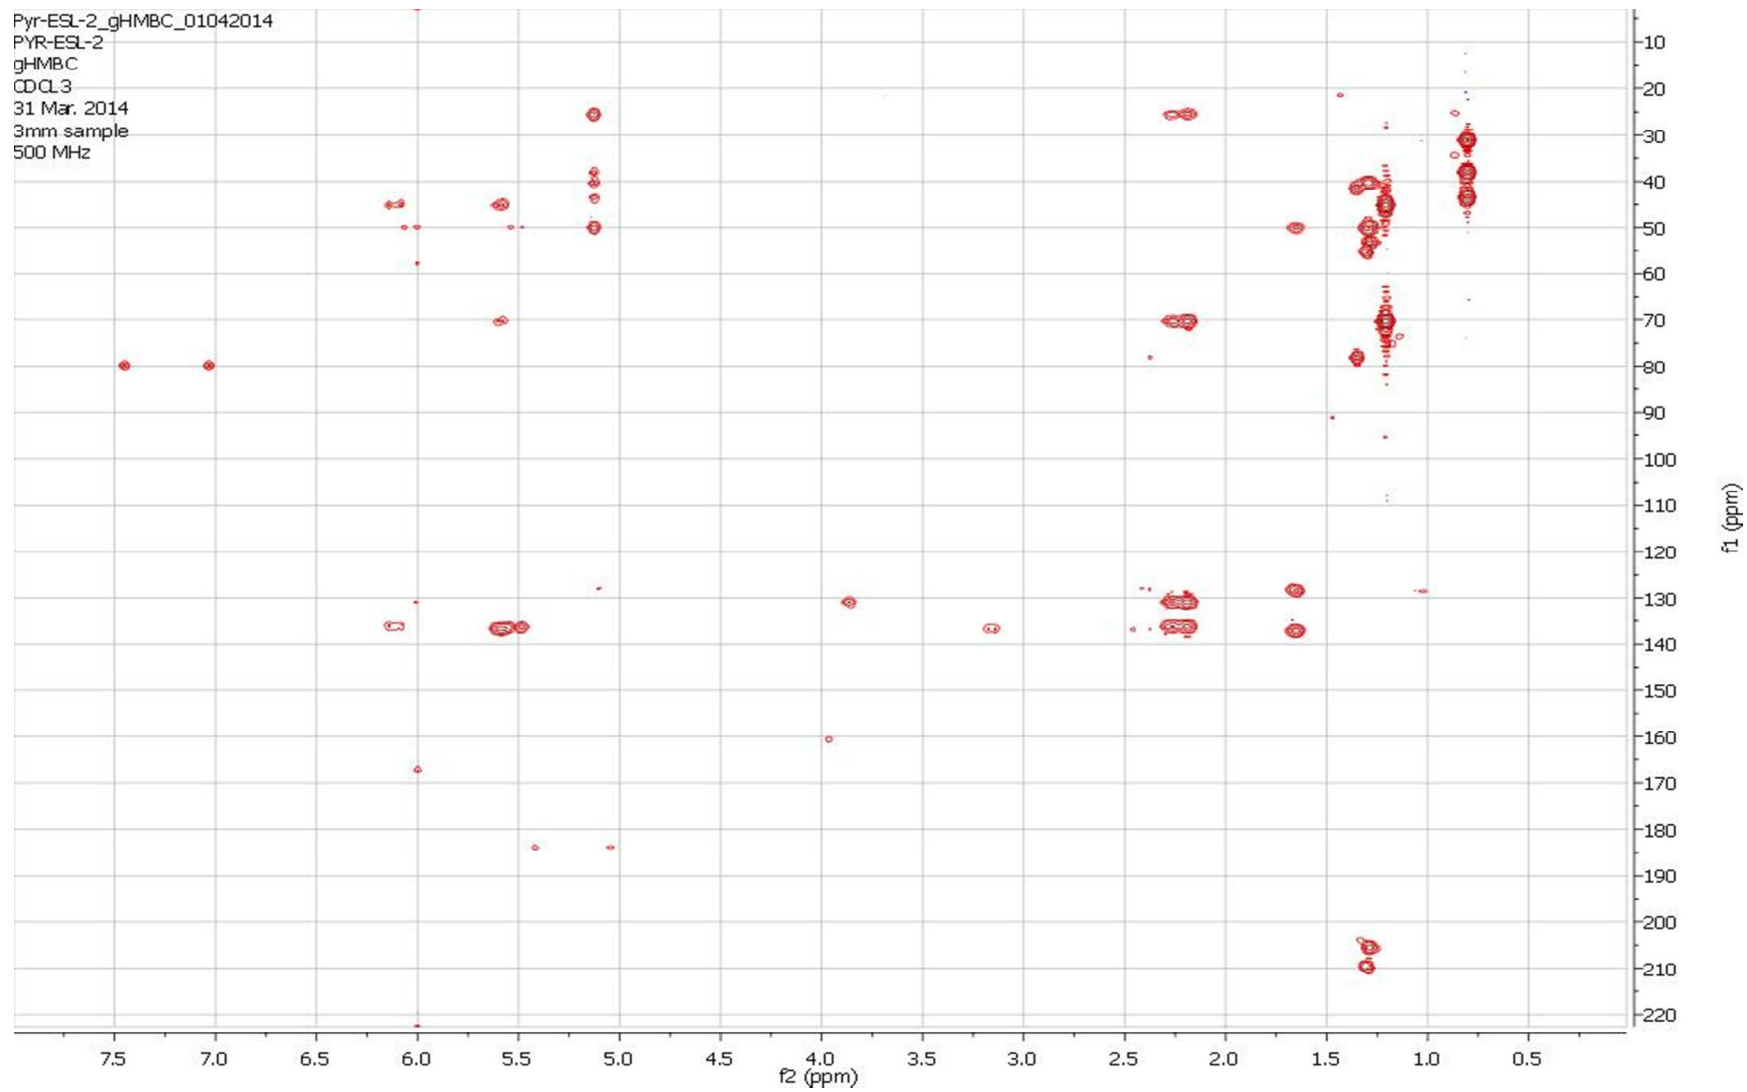

S11. HMBC of Compound **2** in DMSO- $d_6$  at 500 MHz.

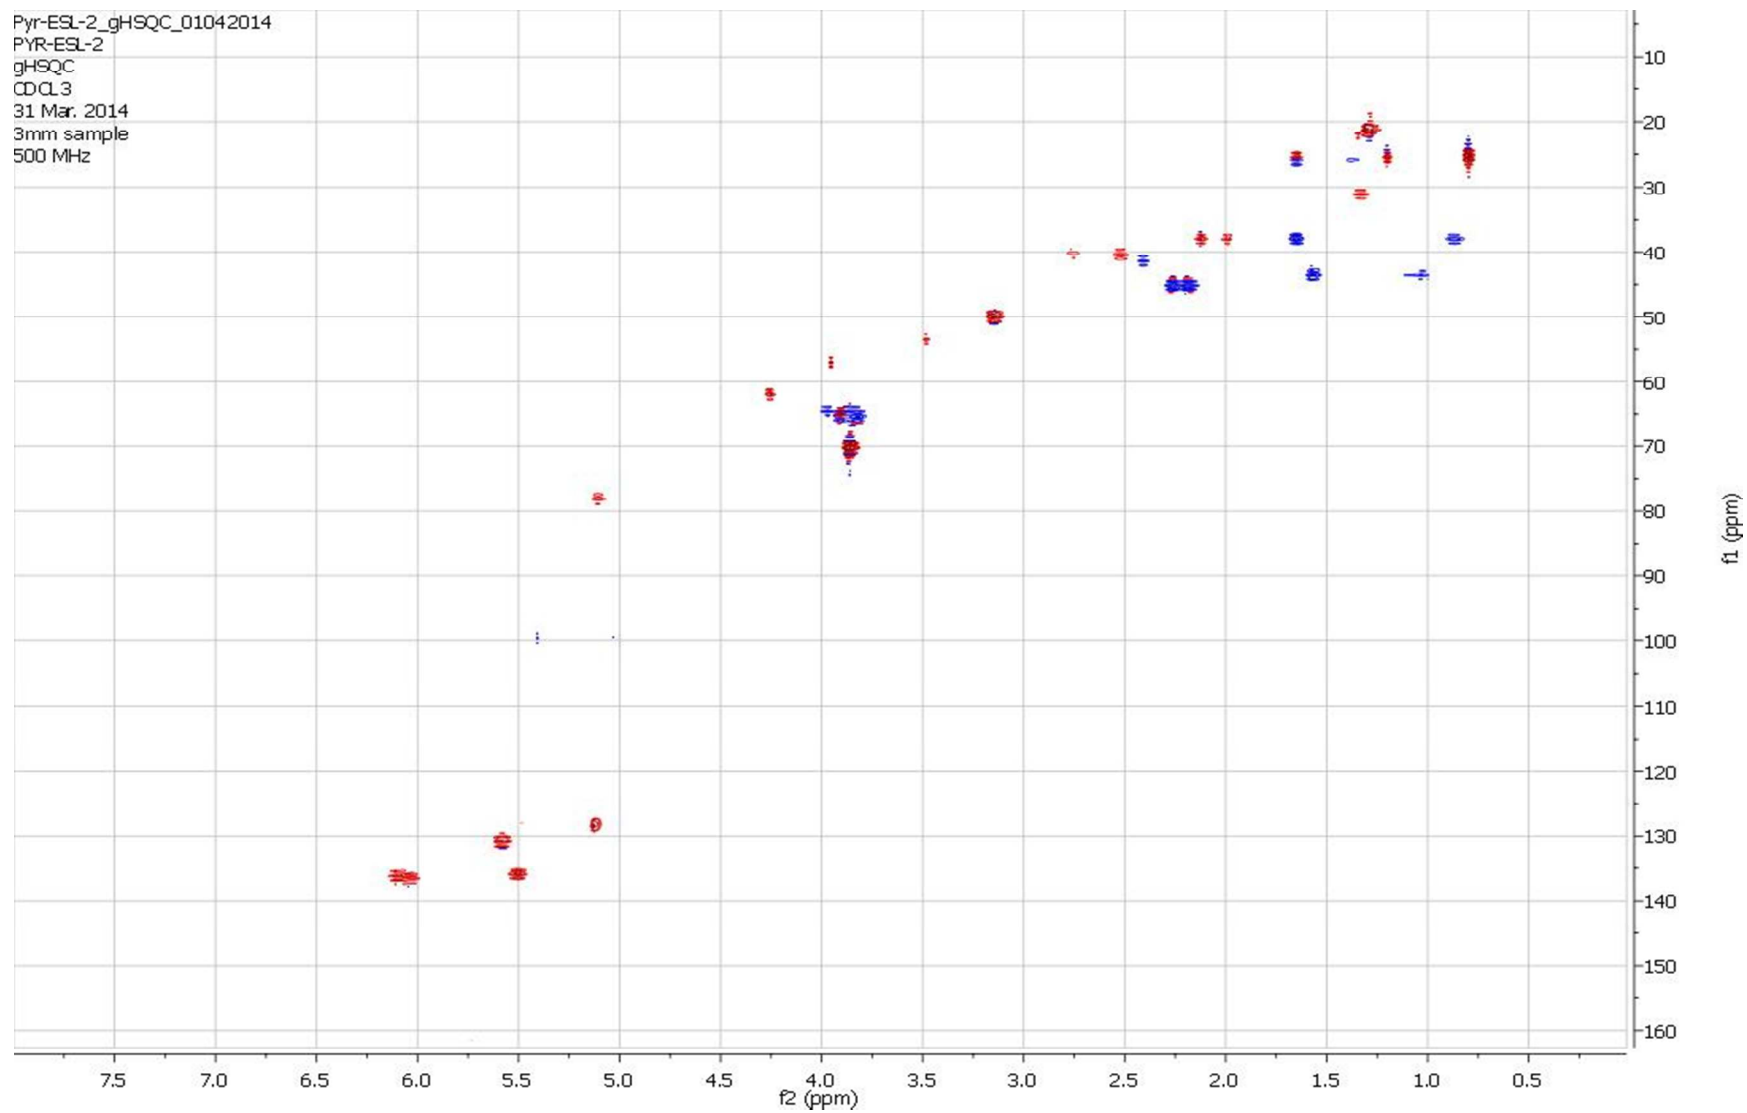

S12. HSQC of Compound **3** in DMSO- $d_6$  at 500 MHz.

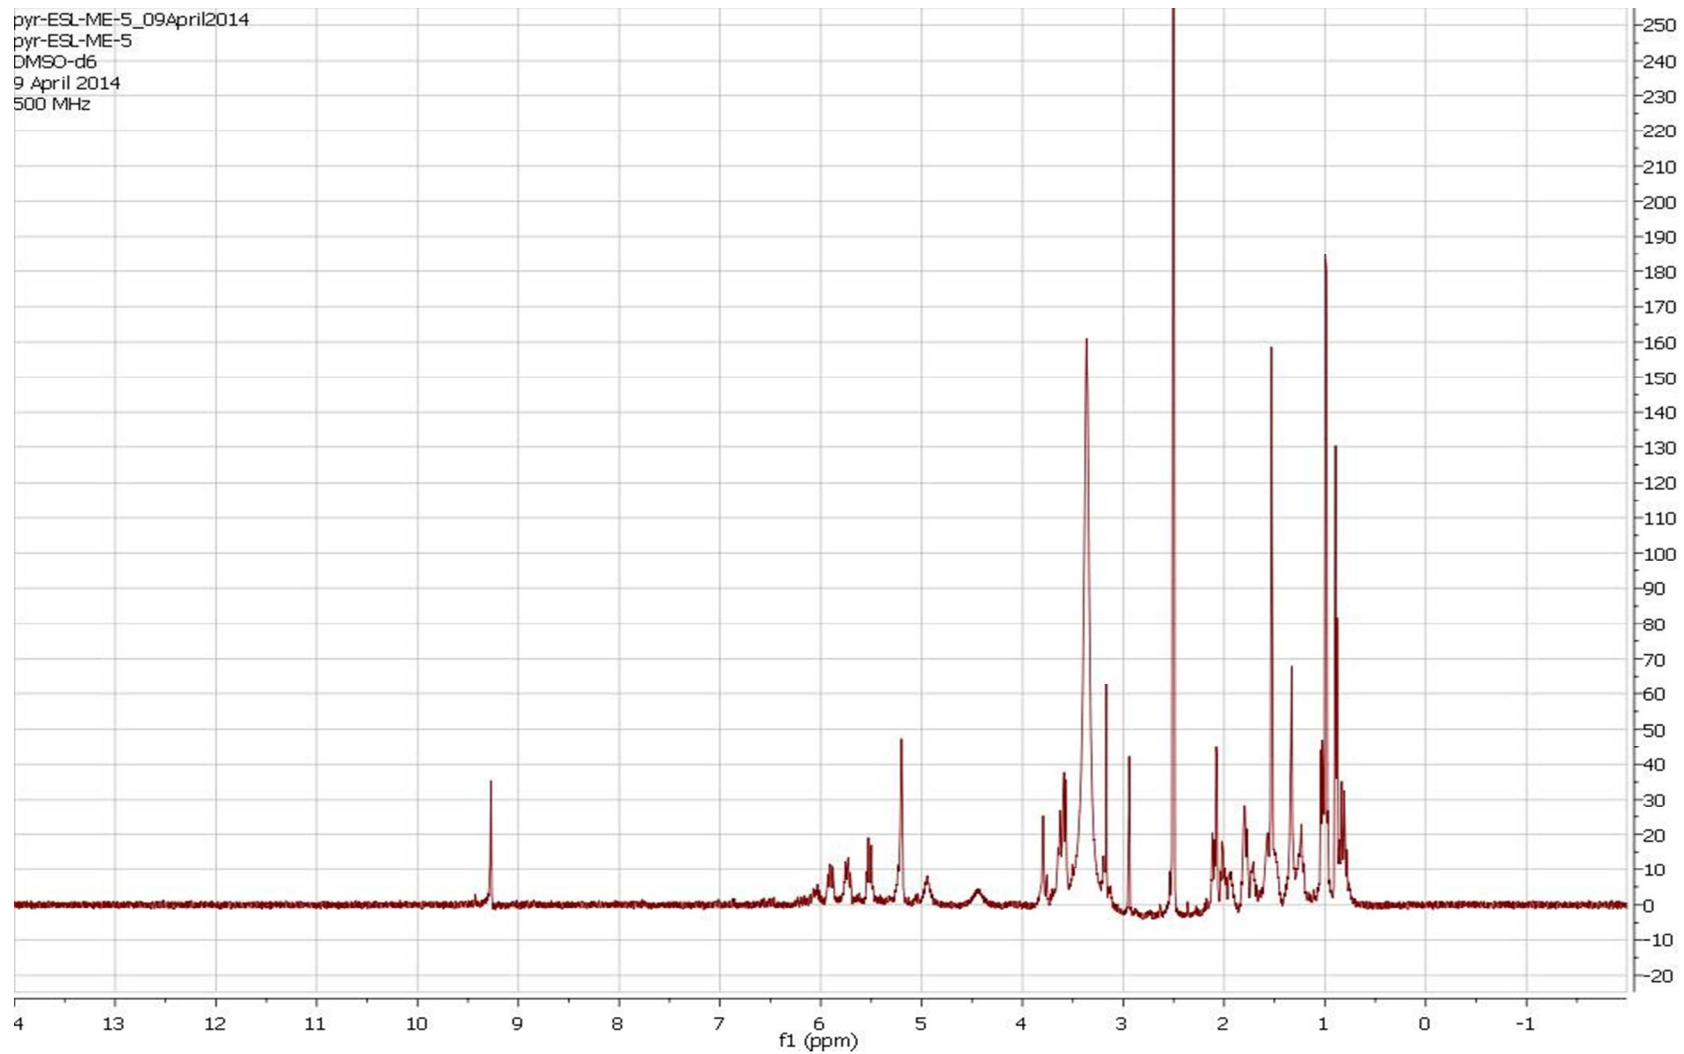

S13.  $^1\text{H}$  NMR of Compound 3 in  $\text{DMSO-}d_6$  at 500 MHz.

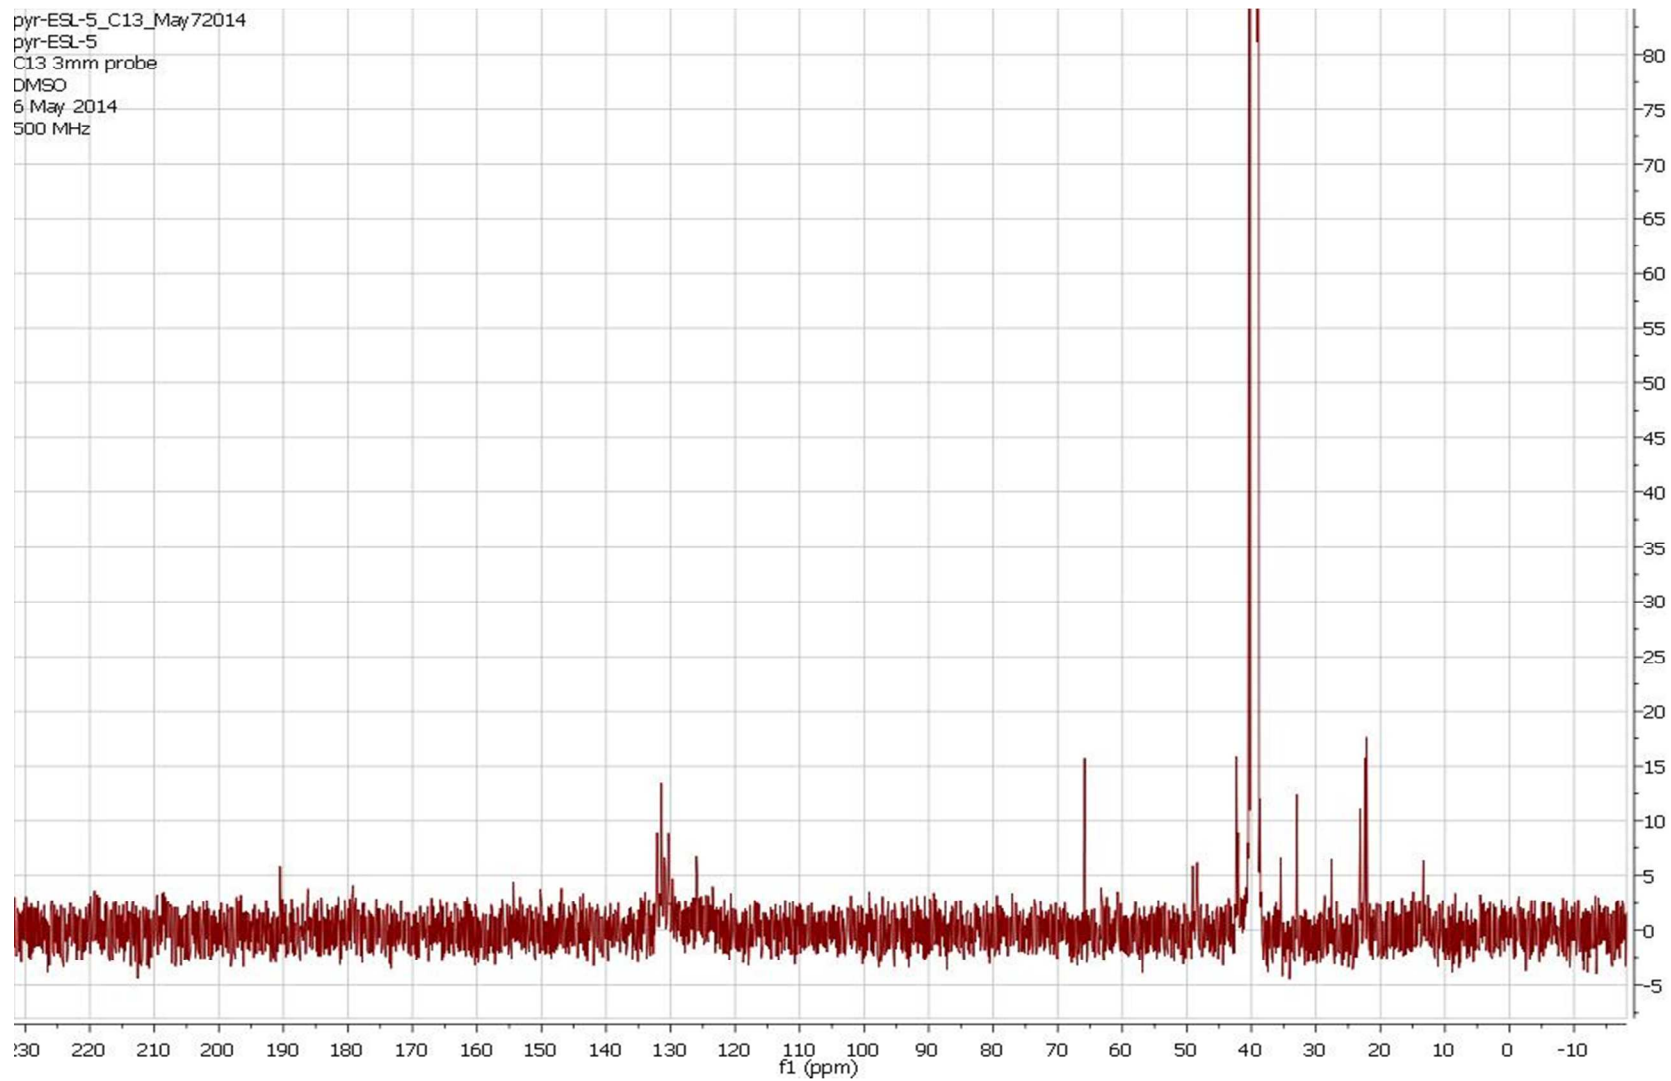

S14.  $^{13}\text{C}$  NMR of Compound **3** in  $\text{DMSO-}d_6$  at 125 MHz.



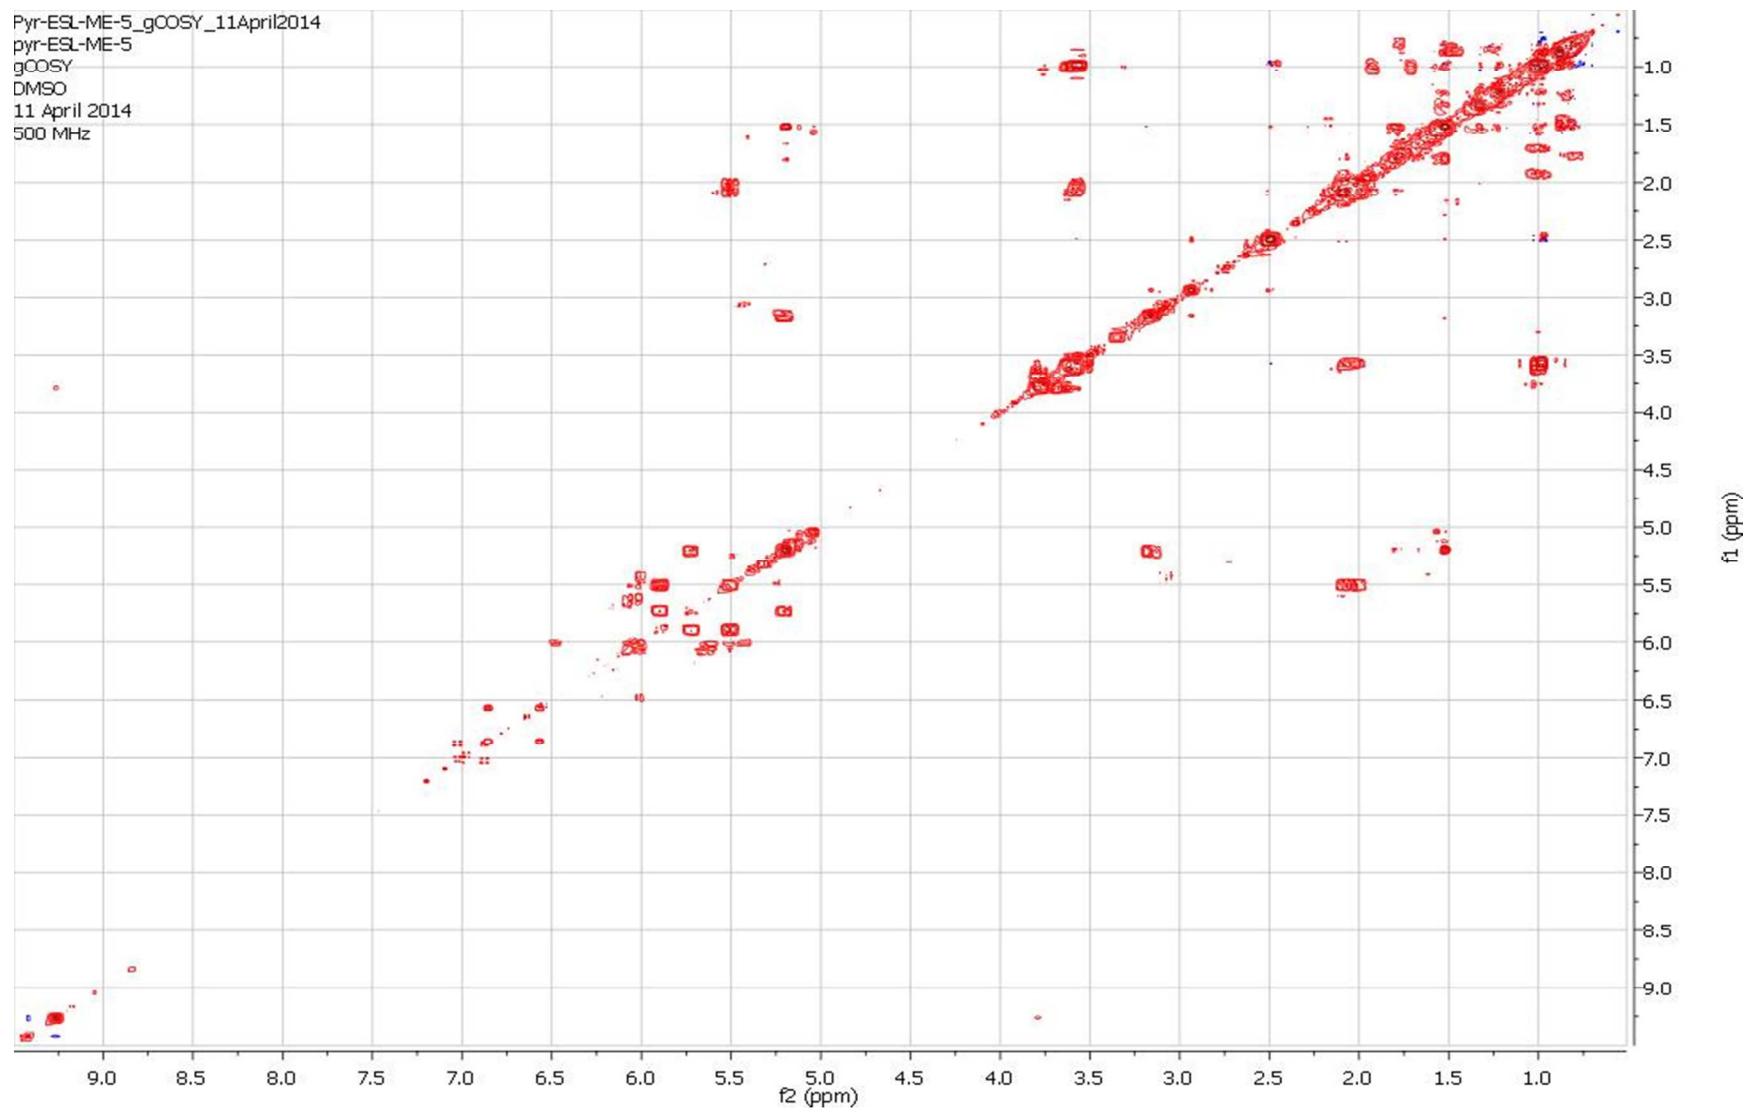

S15. COSY of Compound **3** in DMSO- $d_6$  at 500 MHz.

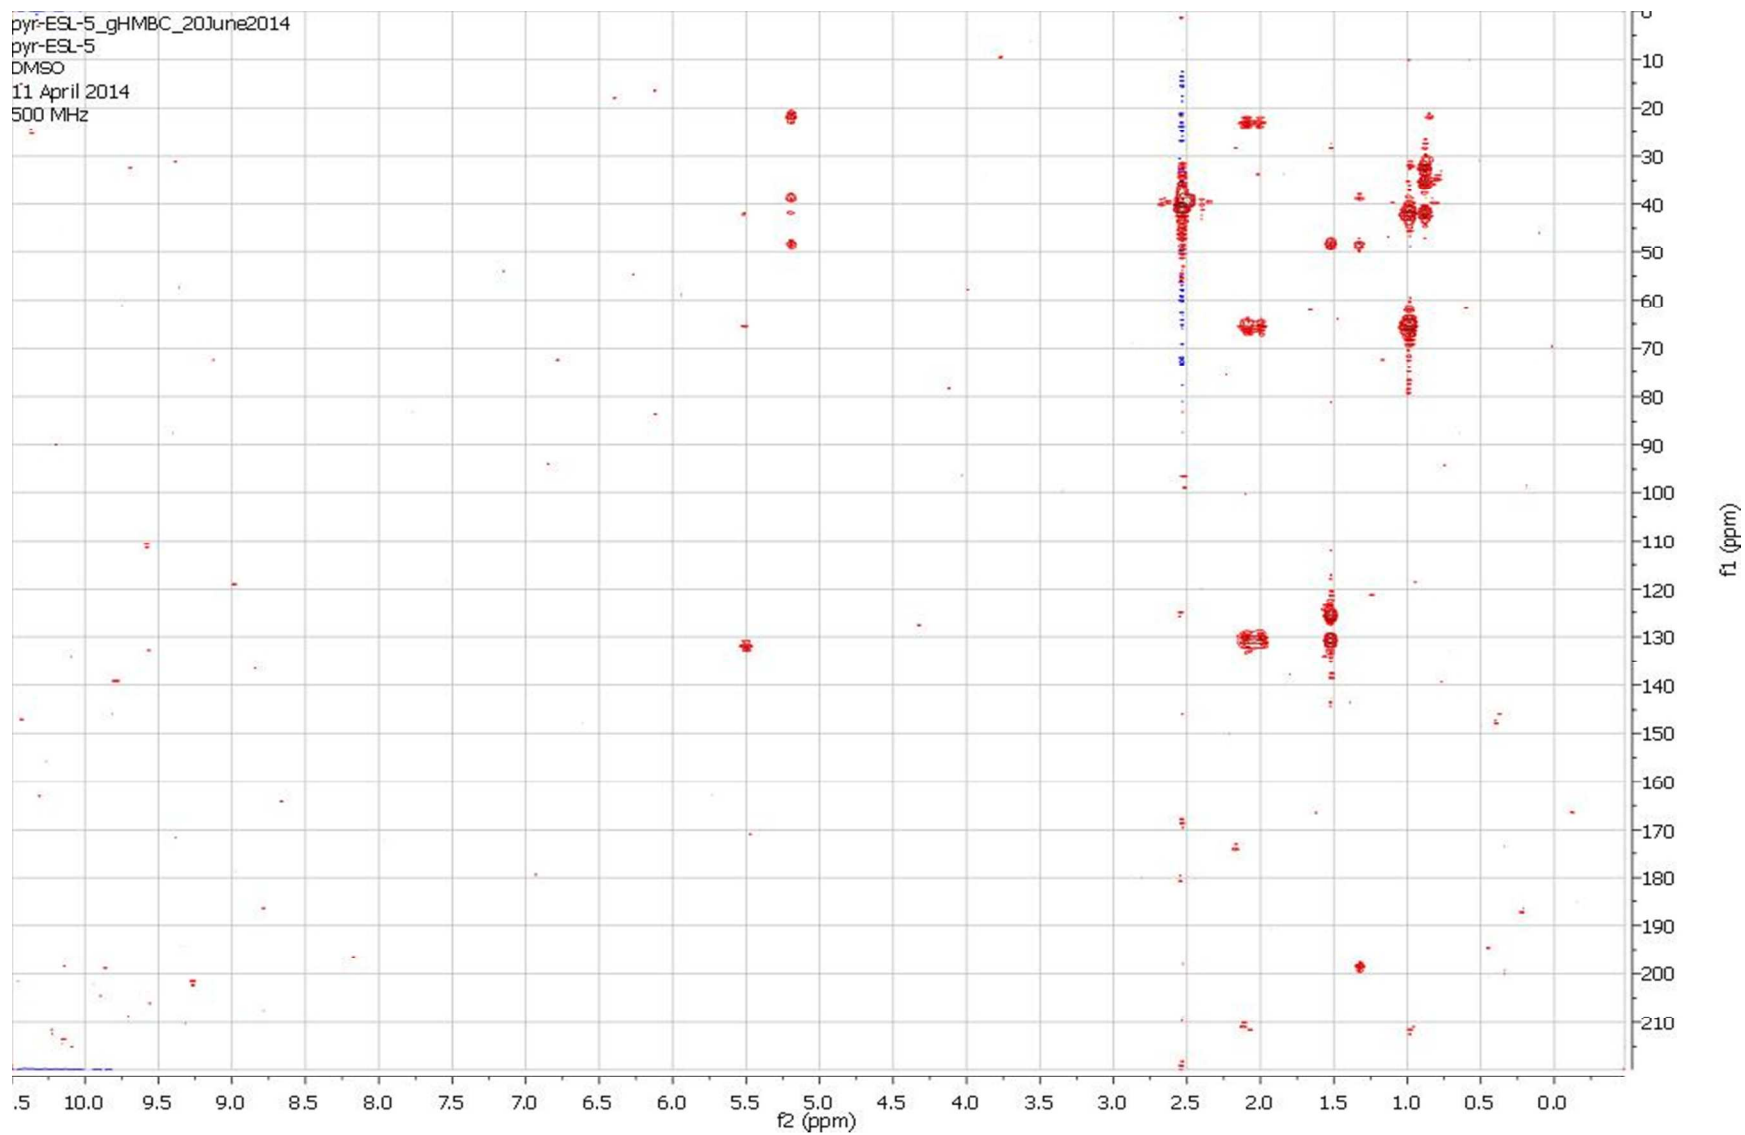

S16. HMBC of Compound **3** in DMSO- $d_6$  at 500 MHz.

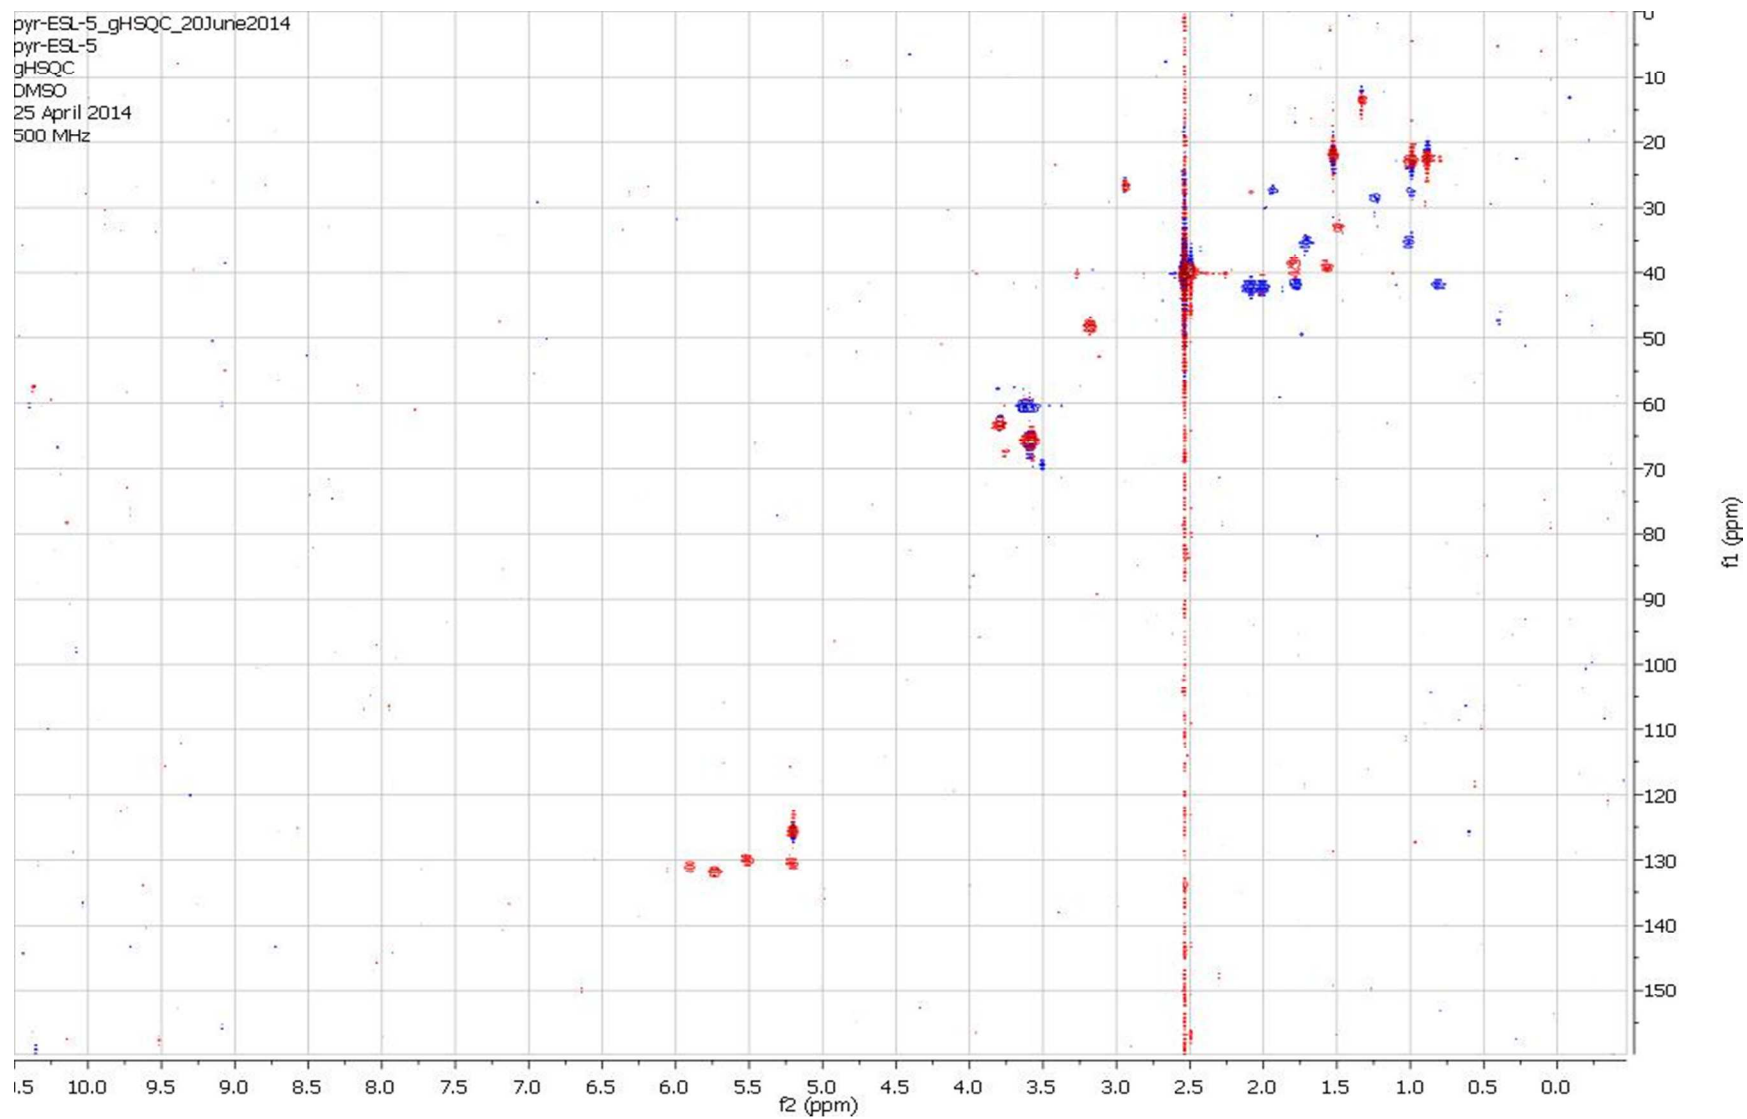

S17. HSQC of Compound **3** in DMSO- $d_6$  at 500 MHz.

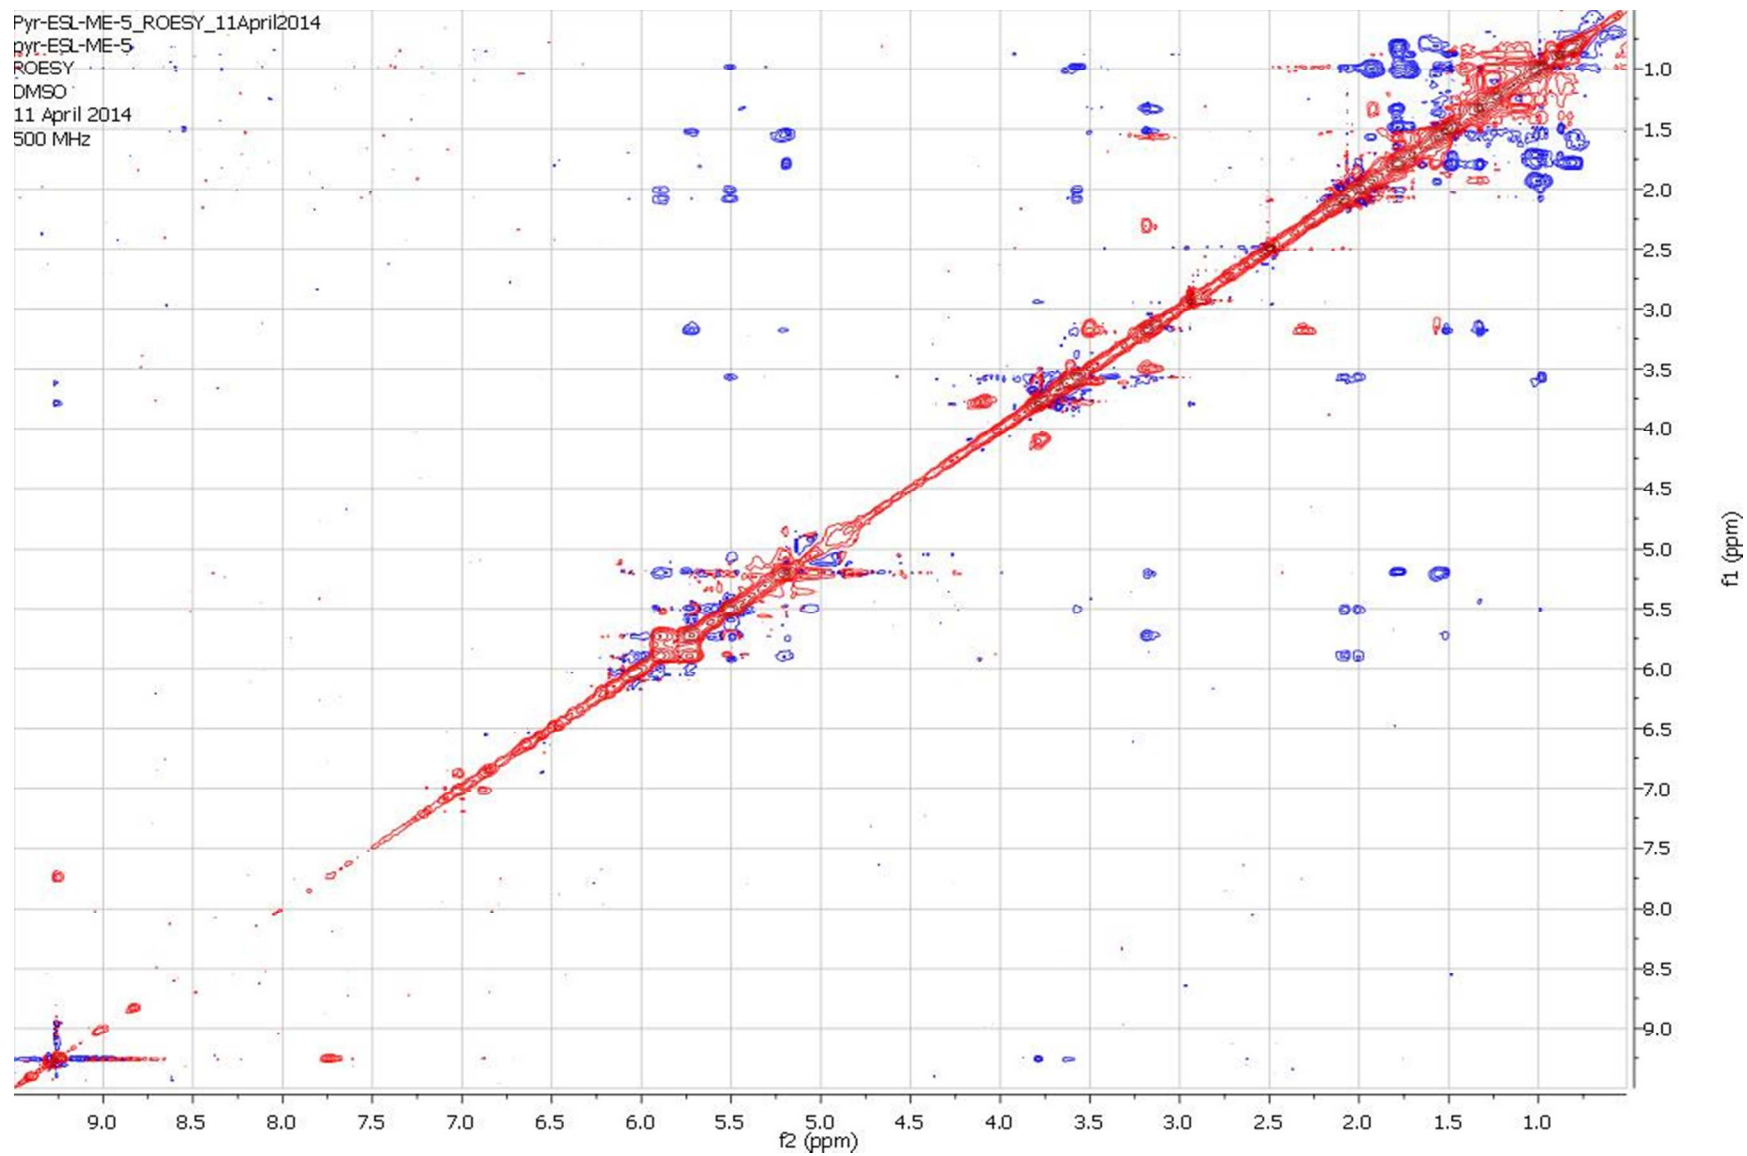

S18. ROESY of Compound **3** in DMSO- $d_6$  at 500 MHz.

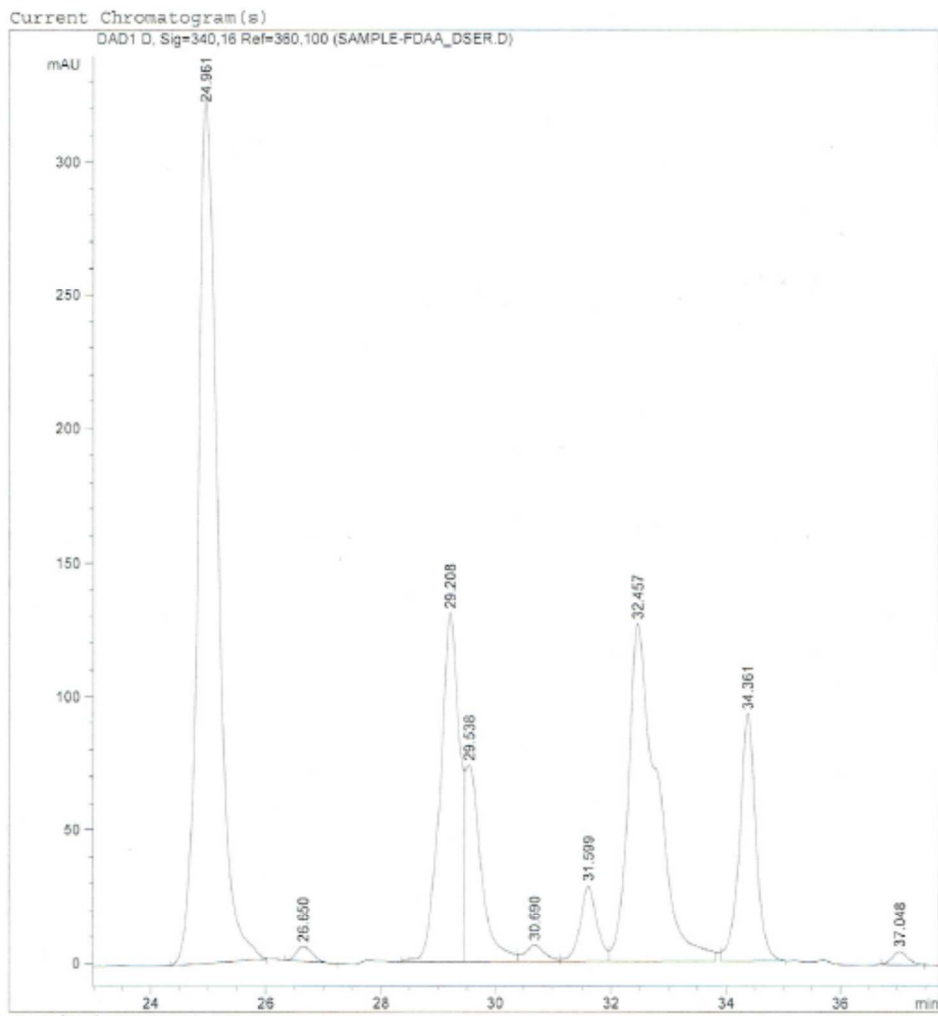

S19. Relevant part of the HPLC chromatogram of hydrolytic product serine-FDLA (HPS-FDLA) co-injected with D-serine-FDLA.

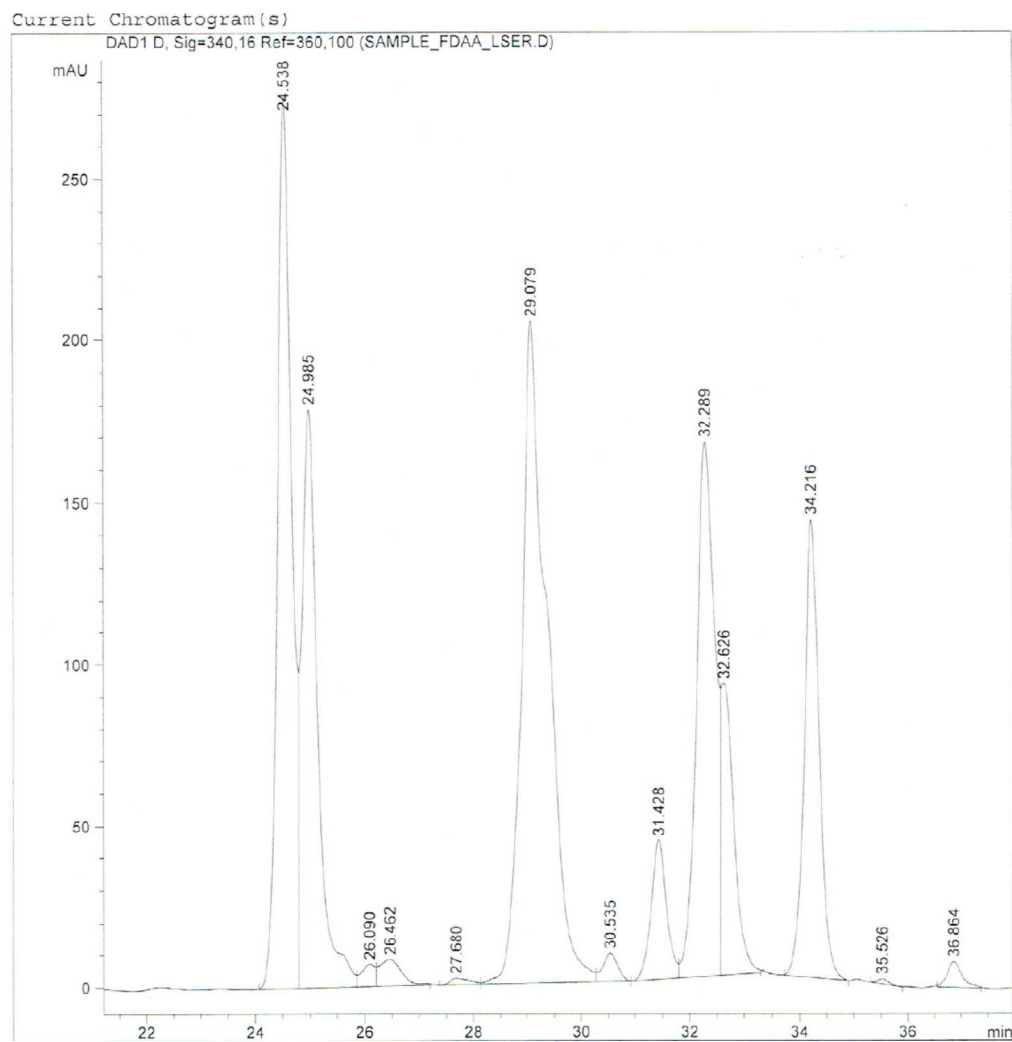

S20. Relevant part of the HPLC chromatogram of hydrolytic product serine-FDLA (HPS-FDLA) co-injected with L-serine-FDLA.
